# Supplementary material for: CDK4/CDK6 Inhibitors Synergize with Midostaurin, Avapritinib, and Nintedanib in Inducing Growth Inhibition in KIT D816V+ Neoplastic Mast Cells
Source: MDPI journal article supplement (doi:10.3390/cancers14133070), 2022-06-23
Supplement: s1 [file cancers-1561408-supplementary.pdf › cancers-1561408-supplementary.pdf]

**Supplemental Materials**

**CDK4/CDK6 inhibitors synergize with midostaurin, avapritinib,  
and nintedanib in inducing growth-arrest in  
*KIT* D816V<sup>+</sup> neoplastic mast cells**

Mathias Schneeweiss-Gleixner<sup>1,2,3</sup>, Yüksel Filik<sup>1,2</sup>, Gabriele Stefanzi<sup>2</sup>, Daniela Berger<sup>2</sup>, Irina Sadovnik<sup>1,2</sup>, Karin Bauer<sup>1,2</sup>, Dubravka Smiljkovic<sup>1,2</sup>, Gregor Eisenwort<sup>1,2</sup>, Nadine Witzeneder<sup>1</sup>, Georg Greiner<sup>1,4,5</sup>, Gregor Hoermann<sup>1,6</sup>, Ana-Iris Schiefer<sup>7</sup>, Juliana Schwaab<sup>8</sup>, Mohamad Jawhar<sup>8</sup>, Andreas Reiter<sup>8</sup>, Wolfgang R. Sperr<sup>1,2</sup>, Michel Arock<sup>9</sup>, Peter Valent<sup>1,2</sup>, Karoline V. Gleixner<sup>1,2</sup>

<sup>1</sup>Ludwig Boltzmann Institute for Hematology and Oncology, Medical University of Vienna, Austria; <sup>2</sup>Department of Internal Medicine I, Division of Hematology and Hemostaseology, Medical University of Vienna, Austria; <sup>3</sup>Department of Medicine III, Division of Gastroenterology and Hepatology, Medical University of Vienna, Austria; <sup>4</sup>Department of Laboratory Medicine, Medical University of Vienna, Austria; <sup>5</sup>Ihr Labor, Medical Diagnostic Laboratories Vienna, Austria; <sup>6</sup>MLL Munich Leukemia Laboratory, Munich, Germany; <sup>7</sup>Department of Pathology, Medical University of Vienna, Austria; <sup>8</sup>Department of Hematology and Oncology, University Medical Center Mannheim and Medical Faculty Mannheim, Heidelberg University, Germany; <sup>9</sup>Department of Hematological Biology, Pitié-Salpêtrière Hospital, Pierre et Marie Curie University (UPMC), Paris, France.

## **I. Supplemental Methods**

### **Reagents**

The dual CDK4/CDK6 inhibitors palbociclib, ribociclib and abemaciclib and the proteasome inhibitor bortezomib were purchased from Selleckchem (Houston, TX, USA). Stock solutions of drugs were prepared by dissolving in dimethyl-sulfoxide (DMSO) (Merck, Darmstadt, Germany). Iscove's modified Dulbecco's medium (IMDM) and penicillin/streptomycin were purchased from Lonza (Verviers, Belgium), fetal calf serum (FCS) from Gibco life technologies (Gaithersburg, MD, USA), alpha-thioglycerol and puromycin from Sigma (St. Louis, MO, USA), amphotericin from PAN Biotech (Aidenbach, Germany) and <sup>3</sup>H-thymidine from Perkin Elmer (Boston, MA, USA). Propidium Iodide (PI) was obtained from eBioscience (San Diego, CA, USA), AnnexinV/FITC and Annexin V/APC from Biolegend (San Diego, CA, USA). Histamine release buffer (HRB) and histamine radioimmunoassay (RIA) kit were purchased from Immunotech (Marseille, France).

### **Culture of human cell lines**

The human MCL-derived cell line HMC-1 was kindly provided by Joseph H. Butterfield (Mayo Clinic, Rochester, MN, USA) [S1]. Two sub-clones were used, namely HMC-1.1 exhibiting *KIT* V560G, and HMC-1.2 harboring *KIT* V560G and *KIT* D816V. HMC-1 cells were grown in Iscove's modified Dulbecco's medium (IMDM) with 10% fetal calf serum (FCS), alpha-thioglycerol and antibiotics at 37°C and 5% CO<sub>2</sub>. The human MC lines ROSA<sup>KIT</sup> WT and ROSA<sup>KIT</sup> D816V were generated and cultured essentially as described [S2]. Furthermore, 4 subclones of multi-resistant MCPV-1 cells

[S3] (MCPV-1.1, MCPV-1.2, MCPV-1.3, and MCPV-1.4), lacking *KIT* D816V but expressing *RAS* G12V, Large T and hTert were used in this study. ROSA and MCPV-1 cells were cultured in IMDM containing 10% FCS. In case of ROSA<sup>KIT WT</sup> and MCPV-1 cells, medium was supplemented with stem cell factor (SCF) as described [S1-3].

### **<sup>3</sup>H-thymidine incorporation assay**

To examine the anti-proliferative effects of CDK4/CDK6 inhibitors primary neoplastic cells and MCL-related cell lines were cultured in 96-well microtiter plates in the absence or presence of various concentrations of palbociclib, ribociclib and abemaciclib for 48 hours. In select experiments, combinations of CDK4/CDK6 inhibitors and KIT-targeting drugs (midostaurin, avapritinib and nintedanib) were applied at a fixed ratio of applied drug concentrations. After treatment, <sup>3</sup>H-thymidine was added to each well. Sixteen hours later, cells were harvested on filter membranes (Packard Bioscience, Meriden, CT) in a Filtermate 196 harvester (Packard Bioscience). Filters were air dried and the bound radioactivity was measured in a β-counter (Top-Count NXT, Packard Bioscience). All experiments were performed in triplicates.

### **Quantitative polymerase chain reaction**

To determine mRNA expression levels in BM samples obtained from patients with SM and in the MCL-related cell lines, quantitative polymerase chain reaction (qPCR) was performed. RNA was isolated using the RNeasy Plus Mini Kit (Qiagen, Hilden, Germany). cDNA was synthesized using Moloney murine leukemia virus reverse transcriptase (Invitrogen, Carlsbad, CA, USA), random primers, first strand buffer, dNTPs (100 mM), and RNasin (all from Promega, Madison, WI, USA) according to

the manufacturer's instructions. PCR was performed as reported [S4] using primers specific for *CDK4*, *CDK6*, *cyclin D1*, *cyclin D2* and *RB1*. A list of PCR primers used in qPCR experiments is provided in Supplemental Table S2. mRNA levels were quantified on a Quant-Studio 3 PCR System (Applied Biosystems, Foster City, CA, USA) using iTAq SYBR Green Supermix with ROX (Bio-Rad, Hercules, CA, USA). mRNA expression was normalized to *ABL1* mRNA and expressed as percentage of *ABL1* mRNA levels. Calculations were based on standard curves established for *CDK4*, *CDK6*, *cyclin D1*, *cyclin D2*, *RB1* and *ABL1* mRNA expression [S4].

### **shRNA-mediated knockdown of *CDK4* and *CDK6***

HMC-1.2 cells were transfected simultaneously with shRNA constructs directed against *CDK4* (inducible knockdown with doxycycline: basic labeling of shRNA with Venus, and after doxycycline-induced expression, shRNA was detected with dsRed) and *CDK6* (basic labeling of shRNA with Venus, detection of induced shRNA with GFP) or with two non-targeting control shRNAs. For knockdown of *CDK4*, hairpins in a miR-E backbone were cloned into the pRRL-based LT3REVIR vector as described [S5]. For knockdown of *CDK6*, hairpins in a miR-E backbone were cloned into the pRRL-based LT3GEPIR vector as described [S5]. Guide sequences of the hairpins are provided in Supplemental Table S4. Production of recombinant vesicular stomatitis virus G glycoprotein pseudotyped lentiviruses and transduction of target cells were performed as described [S6]. Transduced cells were selected with puromycin (2 µg/ml). Knockdown of *CDK4* and *CDK6* was confirmed by western blot analysis in puromycin selected, doxycycline induced cells. After transfection and incubation with doxycycline, transduced cells were sorted for GFP and dsRed positivity on a BD FACS Aria Fusion

(Becton Dickinson, Franklin Lakes, NJ, USA). Un-transduced HMC-1.2 cells were also run through the sorter to provide equal conditions. Thereafter, transduced and un-transduced cells were mixed at a 1:1 ratio and cultured for 10 days. The percentage of GFP+/dsRed+ cells (+/+) was monitored by flow cytometry on days 1, 3, 5 and 10.

### **Histamine release assay**

The histamine release assay was performed on dextran-enriched basophils (healthy donors, n=3) essentially as described [S7-9]. Dextran-enriched basophils were incubated in the presence or absence of various concentrations of CDK4/CDK6 inhibitors (palbociclib, ribociclib, abemaciclib; each 0.01-10  $\mu$ M) for 30 minutes at 37°C, and thereafter incubated with anti-IgE antibody E124.2.8 (1  $\mu$ g/mL) in HRB at 37°C for another 30 minutes. After incubation, cells were centrifuged at 4°C, and the cell-free supernatants and total suspensions recovered and analyzed for histamine content by RIA. Histamine release was calculated and expressed as percentage of total histamine. All experiments were performed in triplicates.

## **II. Supplemental References**

S1. Butterfield JH, Weiler D, Dewald G, Gleich GJ. Establishment of an immature mast cell line from a patient with mast cell leukemia. *Leuk Res.* 1988;12(4):345-355.

S2. Saleh R, Wedeh G, Herrmann H, et al. A new human mast cell line expressing a functional IgE receptor converts to factor-independence and tumorigenicity by KIT D816V-transfection. *Blood.* 2014;124(1):111-120.

S3. Hoermann G, Blatt K, Greiner G, et al. CD52 is a molecular target in advanced systemic mastocytosis. *FASEB J.* 2014;28(8):3540-3551.

S4. Stefanzi G, Berger D, Cerny-Reiterer S, et al. The pan-BCL-2-blocker obatoclax (GX15-070) and the PI3-kinase/mTOR-inhibitor BEZ235 produce cooperative growth-inhibitory effects in ALL cells. *Oncotarget* 2017;28(40):67709–67722.

S5. Fellmann C, Hoffmann T, Sridhar V, et al. An optimized microRNA backbone for effective single-copy RNAi. *Cell Reports.* 2013;5(6):1704-1713.

S6. Hoermann G, Cerny-Reiterer S, Herrmann H, Blatt K, Bilban M, Gisslinger H, et al. Identification of oncostatin M as a JAK2 V617F-dependent amplifier of cytokine production and bone marrow remodeling in myeloproliferative neoplasms. *FASEB J.* 2012;26(2):894-906.

S7. Valent P, Bettelheim P. Cell surface structures on human basophils and mast cells: biochemical and functional characterization. *Adv Immunol.* 1992;52:333-423.

S8. Kneidinger M, Schmidt U, Rix U, et al. The effects of dasatinib on IgE receptor-dependent activation and histamine release in human basophils. *Blood.* 2008;111(6):3097-3107.

S9. Krauth MT, Mirkina I, Herrmann H, Baumgartner C, Kneidinger M, Valent P. Midostaurin (PKC412) inhibits IgE-dependent activation and mediator release in human blood basophils and mast cells. *Clin Exp Allergy.* 2009;39(11):1711-1720.

S10. Eisenwort G, Sadovnik I, Schwaab J, et al. Identification of a leukemia-initiating stem cell in human mast cell leukemia. *Leukemia.* 2019;33(11):2673-2684.

### **III. Supplemental Tables**

#### **Supplemental Table S1**

**Patients' characteristics (n=50 patients with SM): samples used for qPCR analysis**

| <b>Patient No.</b> | <b>Gender</b> | <b>Age</b> | <b>Diagnosis</b> | <b><i>KIT</i> D816V</b> | <b>BM Infiltration (%)</b> | <b>Tryptase (µg/L)</b> |
|--------------------|---------------|------------|------------------|-------------------------|----------------------------|------------------------|
| S#1                | f             | 29         | ISM              | +                       | 5                          | 30.5                   |
| S#2                | m             | 66         | ISM              | +                       | 15                         | 65.4                   |
| S#3                | m             | 45         | ISM              | -                       | 5                          | 35.4                   |
| S#4                | w             | 56         | ISM              | -                       | 15                         | 36.6                   |
| S#5                | w             | 41         | ISM              | +                       | 3                          | 17.3                   |
| S#6                | m             | 52         | ISM              | +                       | 10                         | 47.4                   |
| S#7                | w             | 32         | ISM              | +                       | 5                          | 15.5                   |
| S#8                | w             | 48         | ISM              | +                       | 5                          | 36.6                   |
| S#9                | w             | 68         | ISM              | +                       | 5                          | 16.8                   |
| S#10               | m             | 38         | ISM              | +                       | 5                          | 20.1                   |
| S#11               | w             | 60         | ISM              | +                       | 30                         | 144                    |
| S#12               | w             | 56         | ISM              | +                       | 10                         | 43.9                   |
| S#13               | w             | 34         | ISM              | +                       | 5                          | 22                     |
| S#14               | w             | 55         | ISM              | +                       | 30                         | 94.5                   |
| S#15               | w             | 78         | ISM              | +                       | 22                         | 142                    |
| S#16               | w             | 63         | ISM              | +                       | 1                          | 32.7                   |
| S#17               | m             | 81         | ISM              | +                       | 5                          | 30.7                   |
| S#18               | w             | 39         | ISM              | +                       | 30                         | 11.5                   |
| S#19               | m             | 30         | ISM              | +                       | 30                         | 68.2                   |
| S#20               | w             | 20         | ISM              | +                       | 10                         | 41.5                   |
| S#21               | m             | 43         | ISM              | +                       | 30                         | 29.5                   |
| S#22               | w             | 22         | ISM              | +                       | 5                          | 9.2                    |
| S#23               | w             | 44         | ISM              | +                       | 5                          | 14                     |
| S#24               | w             | 29         | ISM              | +                       | 15                         | 45.5                   |
| S#25               | w             | 61         | ISM              | +                       | 25                         | 51.5                   |
| S#26               | m             | 24         | ISM              | +                       | 10                         | 53.7                   |
| S#27               | m             | 62         | ISM              | +                       | 25                         | 26.2                   |
| S#28               | f             | 55         | SSM              | +                       | 20                         | 133                    |
| S#29               | m             | 73         | ASM              | +                       | 25                         | 145                    |
| S#30               | w             | 58         | ASM              | +                       | 20                         | 35                     |
| S#31               | m             | 73         | ASM              | +                       | 60                         | 1926                   |
| S#32               | m             | 61         | ASM              | +                       | 40                         | 401                    |
| S#33               | m             | 51         | ASM              | -                       | 15                         | 36.6                   |
| S#34               | m             | 66         | SM-AHN           | +                       | 15                         | 331                    |
| S#35               | m             | 70         | SM-AHN           | +                       | 5                          | 10.8                   |
| S#36               | f             | 78         | SM-AHN           | +                       | 5                          | 30.4                   |
| S#37               | m             | 78         | SM-AHN           | +                       | 10                         | 118                    |
| S#38               | m             | 54         | SM-AHN           | +                       | 25                         | 284                    |
| S#39               | m             | 64         | SM-AHN           | +                       | 15                         | 247                    |
| S#40               | m             | 56         | SM-AHN           | -                       | 5                          | 16.8                   |
| S#41               | w             | 39         | SM-AHN           | +                       | 15                         | 41.1                   |
| S#42               | w             | 64         | SM-AHN           | -                       | 2                          | 8.9                    |
| S#43               | m             | 66         | SM-AHN           | +                       | 10                         | 186                    |
| S#44               | m             | 65         | SM-AHN           | -                       | 15                         | 37.8                   |

|      |   |    |     |       |    |      |
|------|---|----|-----|-------|----|------|
| S#45 | w | 54 | MCL | D816H | 20 | >200 |
| S#46 | w | 49 | MCL | -     | 70 | 533  |
| S#47 | m | 30 | MCL | +     | 20 | 30   |
| S#48 | m | 26 | MCL | -     | 30 | 41.8 |
| S#49 | m | 58 | MCL | +     | 60 | 250  |
| S#50 | m | 73 | MCL | +     | 25 | 47.2 |

qPCR was performed with BM samples from 50 patients with SM classified as ISM (n=27), SSM (n=1), ASM (n=5), SM-AHN (n=11) and MCL (n=6). Diagnoses were established according to WHO criteria. The percentage of BM MC infiltration was assessed by immunohistochemistry using antibodies against tryptase and KIT. Abbreviations: No., number; BM, bone marrow; MC, mast cells; WHO, World Health Organization; m, male; f, female; SM, systemic mastocytosis; ISM, indolent SM; SSM, smoldering SM, ASM, aggressive SM; MCL, mast cell leukemia; SM-AHN, SM with an associated hematologic neoplasm.

## Supplemental Table S2

### qPCR primers

| Gene            | Sequence                                                                 |
|-----------------|--------------------------------------------------------------------------|
| Human CDK4      | 5'-GTGGACATGTGGAGTGTTGG-3'(fwd)<br>5'-CTGGTCGGCTTCAGAGTTTC-3'(rev)       |
| Human CDK6      | 5'-AAGTTCCAGAGCCTGGAGTG-3'(fwd)<br>5'-CGATGCACTACTCGGTGTGA-3'(rev)       |
| Human Cyclin D1 | 5'-CAAATGTGTGCAGAAGGAGGT-3'(fwd)<br>5'-CTCCTCGCACTTCTGTTTCCT-3'(rev)     |
| Human Cyclin D2 | 5'-GTGCAGAAGGACATCCAACC-3'(fwd)<br>5'-TCGCACTTCTGTTTCCTCACA-3'(rev)      |
| Human ABL1      | 5'-TGTATGATTTTGTGGCCAGTGGAG-3'(fwd)<br>5'-GCCTAAGACCCGGAGCTTTTCA-3'(rev) |
| Human RB1       | 5'-AGAGCTTGGTTAACTTGGGAGA-3'(fwd)<br>5'-ACAGATTCCCCACAGTTCCTTT-3'(rev)   |

Abbreviations: qPCR, quantitative polymerase chain reaction analysis; fwd, forward; rev, reversed.

**Supplemental Table S3****Antibodies used in western Blot experiments**

| Protein/Epitope            | Clone      | Source | Dilution | Company        |
|----------------------------|------------|--------|----------|----------------|
| CDK4                       | D9G3E      | rabbit | 1:1000   | Cell Signaling |
| CDK6                       | DCS83      | mouse  | 1:1000   | Cell Signaling |
| Cyclin D1                  | 92G2       | mouse  | 1:500    | Cell Signaling |
| Cyclin D2                  | D52F9      | mouse  | 1:750    | Cell Signaling |
| pRB1 (Ser807/811)          | polyclonal | rabbit | 1:1000   | Cell Signaling |
| RB1                        | sc-74562   | mouse  | 1:500    | Santa Cruz     |
| Cleaved Caspase-3 (Asp175) | polyclonal | rabbit | 1:1000   | Cell Signaling |
| Actin                      | sc-58673   | mouse  | 1:1000   | Santa Cruz     |
| $\beta$ -Tubulin           | sc-53140   | mouse  | 1:7500   | Santa Cruz     |

The antibodies were purchased from the following companies: Santa Cruz Biotechnology (Santa Cruz, CA, USA); Cell Signaling Technology (Beverly, MA, USA). Abbreviations: CDK, cyclin dependent kinase; p, phosphorylated; RB1, retinoblastoma protein 1.

**Supplemental Table S4****shRNAs applied in knockdown experiments**

| Gene | Construct Name | Guide sequence         |
|------|----------------|------------------------|
| CDK4 | CDK4 #3        | TAGTGTAGAGAAATGGGAAGGA |
| CDK6 | CDK6 #3        | TTTGATAGAGTAAATGTATGGC |

Abbreviations: CDK, cyclin dependent kinase

**Supplemental Table S5****Expression of proteins involved in cell cycle progression in human mast cell lines as analyzed by western blotting**

|                  | <b>HMC-1.1</b> | <b>HMC-1.2</b> | <b>ROSA<sup>KIT</sup> WT</b> | <b>ROSA<sup>KIT</sup> D816V</b> | <b>MCPV-1.1</b> | <b>MCPV-1.2</b> | <b>MCPV-1.3</b> | <b>MCPV-1.4</b> |
|------------------|----------------|----------------|------------------------------|---------------------------------|-----------------|-----------------|-----------------|-----------------|
| <b>CDK4</b>      | +              | +              | +                            | +                               | +               | +               | +               | +               |
| <b>CDK6</b>      | +              | +              | +                            | +                               | +               | +               | +               | +               |
| <b>Cyclin D1</b> | +              | +              | +                            | +                               | +               | +               | +               | +               |
| <b>Cyclin D2</b> | +              | +/-            | +                            | +                               | -               | -               | -               | -               |
| <b>RB1</b>       | +              | +              | +                            | +                               | +               | +               | +               | +               |

Mast cell lines were analyzed for expression of cell cycle regulators by western blotting experiments (n=3) using antibodies directed against CDK4, CDK6, cyclin D1, cyclin D2, and RB1. Proteins were either detectable (+) or not detectable (-) in all experiments; in one case, a weak protein expression was seen in 2 out of 3 experiments (+/-).

**Supplemental Table S6**

**Statistical significance of anti-proliferative effects of CDK4/CDK6 inhibitors in the human MC lines HMC-1, ROSA and MCPV-1**

| <b>Cell line</b>          | <b>Compound</b> | <b>IC<sub>50</sub> value</b> | <b>ANOVA</b> | <b>Post-hoc test*</b> |
|---------------------------|-----------------|------------------------------|--------------|-----------------------|
| HMC-1.1                   | Palbociclib     | 92.6±10.3 nM                 | p<0.0001     | p<0.05 for 0.05-1 µM  |
| HMC-1.1                   | Ribociclib      | 245.6±33.4 nM                | p<0.0001     | p<0.05 for 0.05-1 µM  |
| HMC-1.1                   | Abemaciclib     | 174.5±20.9 nM                | p<0.0001     | p<0.05 for 0.05-1 µM  |
| HMC-1.2                   | Palbociclib     | 296.1±22.3 nM                | p<0.0001     | p<0.05 for 0.1-1 µM   |
| HMC-1.2                   | Ribociclib      | 703.8±155 nM                 | p=0.0014     | p<0.05 for 0.5-1 µM   |
| HMC-1.2                   | Abemaciclib     | 143.8±14 nM                  | p<0.0001     | p<0.05 for 0.01-1 µM  |
| ROSA <sup>KIT WT</sup>    | Palbociclib     | 35.1±2.2 nM                  | p<0.0001     | p<0.05 for 0.01-1 µM  |
| ROSA <sup>KIT WT</sup>    | Ribociclib      | 262±9.5 nM                   | p<0.0001     | p<0.05 for 0.05-1 µM  |
| ROSA <sup>KIT WT</sup>    | Abemaciclib     | 48.4±3.5 nM                  | p<0.0001     | p<0.05 for 0.01-1 µM  |
| ROSA <sup>KIT D816V</sup> | Palbociclib     | 123±13.1 nM                  | p<0.0001     | p<0.05 for 0.05-1 µM  |
| ROSA <sup>KIT D816V</sup> | Ribociclib      | 303.3±14.9 nM                | p<0.0001     | p<0.05 for 0.05-1 µM  |
| ROSA <sup>KIT D816V</sup> | Abemaciclib     | 134.1±5.1 nM                 | p<0.0001     | p<0.05 for 0.05-1 µM  |
| MCPV-1.1                  | Palbociclib     | >10 µM                       | p=0.0953     | p<0.05 for 10 µM      |
| MCPV-1.1                  | Ribociclib      | >10 µM                       | p=0.0021     | p<0.05 for 10 µM      |
| MCPV-1.1                  | Abemaciclib     | 1.48±0.2 µM                  | p<0.0001     | p<0.05 for 1-10 µM    |
| MCPV-1.2                  | Palbociclib     | >10 µM                       | p=0.0002     | p<0.05 for 10 µM      |
| MCPV-1.2                  | Ribociclib      | >10 µM                       | p<0.0001     | p<0.05 for 0.5-10 µM  |
| MCPV-1.2                  | Abemaciclib     | 0.9±0.07 µM                  | p<0.0001     | p<0.05 for 0.05-10 µM |
| MCPV-1.3                  | Palbociclib     | >10 µM                       | p=0.0008     | p<0.05 for 10 µM      |
| MCPV-1.3                  | Ribociclib      | >10 µM                       | p<0.0001     | p<0.05 for            |

|          |             |                          |          |                            |
|----------|-------------|--------------------------|----------|----------------------------|
|          |             |                          |          | 10 $\mu$ M                 |
| MCPV-1.3 | Abemaciclib | 2.83 $\pm$ 0.426 $\mu$ M | p<0.0001 | p<0.05 for<br>10 $\mu$ M   |
| MCPV-1.4 | Palbociclib | >10 $\mu$ M              | p<0.0001 | p<0.05 for<br>10 $\mu$ M   |
| MCPV-1.4 | Ribociclib  | >10 $\mu$ M              | p<0.0001 | p<0.05 for<br>10 $\mu$ M   |
| MCPV-1.4 | Abemaciclib | 1.32 $\pm$ 0.16 $\mu$ M  | p<0.0001 | p<0.05 for<br>5-10 $\mu$ M |

Cell lines were incubated in various concentrations of palbociclib, ribociclib or abemaciclib at 37°C for 48 hours. Then, proliferation was determined by measuring uptake of  $^3\text{H}$ -thymidine and  $\text{IC}_{50}$  values were calculated from 3 independent experiments. To determine the significance level in drug-induced inhibition of proliferation, we applied analysis of variance testing (ANOVA). \*The post-testing was performed by Dunnett-test; p<0.05 is considered statistically significant. Abbreviations:  $\text{IC}_{50}$ , half maximal inhibitory concentration; nM: nanomolar;  $\mu$ M: micromolar.

**Supplemental Table S7****Statistical significance of pro-apoptotic effects of CDK4/CDK6 inhibitors in the human MC lines HMC-1, ROSA and MCPV-1**

| <b>Cell line</b>          | <b>Compound</b> | <b>Range (<math>\mu</math>M)</b> | <b>ANOVA</b> | <b>Post-hoc test*</b>     |
|---------------------------|-----------------|----------------------------------|--------------|---------------------------|
| HMC-1.1                   | Palbociclib     | 1-10                             | $p>0.05$     | n.a.                      |
| HMC-1.1                   | Ribociclib      | 1-10                             | $p>0.05$     | n.a.                      |
| HMC-1.1                   | Abemaciclib     | 1-10                             | $p>0.05$     | n.a.                      |
| HMC-1.2                   | Palbociclib     | 1-10                             | $p>0.05$     | n.a.                      |
| HMC-1.2                   | Ribociclib      | 1-10                             | $p>0.05$     | n.a.                      |
| HMC-1.2                   | Abemaciclib     | 1-10                             | $p=0.00046$  | $p<0.05$ for 5-10 $\mu$ M |
| ROSA <sup>KIT WT</sup>    | Palbociclib     | 1-10                             | $p>0.05$     | n.a.                      |
| ROSA <sup>KIT WT</sup>    | Ribociclib      | 1-10                             | $p>0.05$     | n.a.                      |
| ROSA <sup>KIT WT</sup>    | Abemaciclib     | 1-10                             | $p=0.0039$   | $p<0.05$ for 5-10 $\mu$ M |
| ROSA <sup>KIT D816V</sup> | Palbociclib     | 1-10                             | $p>0.05$     | n.a.                      |
| ROSA <sup>KIT D816V</sup> | Ribociclib      | 1-10                             | $p=0.0301$   | n.a.                      |
| ROSA <sup>KIT D816V</sup> | Abemaciclib     | 1-10                             | $p=0.0002$   | $p<0.05$ for 5-10 $\mu$ M |
| MCPV-1.1                  | Palbociclib     | 1-10                             | $p>0.05$     | n.a.                      |
| MCPV-1.1                  | Ribociclib      | 1-10                             | $p>0.05$     | n.a.                      |
| MCPV-1.1                  | Abemaciclib     | 1-10                             | $p=0.0073$   | $p<0.05$ for 10 $\mu$ M   |
| MCPV-1.2                  | Palbociclib     | 1-10                             | $p>0.05$     | n.a.                      |
| MCPV-1.2                  | Ribociclib      | 1-10                             | $p>0.05$     | n.a.                      |
| MCPV-1.2                  | Abemaciclib     | 1-10                             | $p=0.0053$   | $p<0.05$ for 5-10 $\mu$ M |
| MCPV-1.3                  | Palbociclib     | 1-10                             | $p>0.05$     | n.a.                      |
| MCPV-1.3                  | Ribociclib      | 1-10                             | $p>0.05$     | n.a.                      |
| MCPV-1.3                  | Abemaciclib     | 1-10                             | $p>0.05$     | n.a.                      |
| MCPV-1.4                  | Palbociclib     | 1-10                             | $p>0.05$     | n.a.                      |
| MCPV-1.4                  | Ribociclib      | 1-10                             | $p>0.05$     | n.a.                      |
| MCPV-1.4                  | Abemaciclib     | 1-10                             | $p=0.0028$   | $p<0.05$ for 5-10 $\mu$ M |

Cell lines were incubated in various concentrations (range: 1–10  $\mu$ M) of palbociclib, ribociclib or abemaciclib at 37°C for 48 hours. Then, the percentage of apoptotic cells was determined by flow cytometry. To compare the dose effect of different dose levels, we used ANOVA. \*Post-testing was performed by Dunnett-test;  $p<0.05$  is considered statistically significant. Abbreviations:  $\mu$ M: micromolar; n.a.

**Supplemental Table S8****Statistical significance of anti-proliferative effects of CDK4/CDK6 inhibitors in primary neoplastic MC**

| <b>Patient / Diagnosis</b> | <b>Drug</b> | <b>IC<sub>50</sub>-value</b> | <b>ANOVA</b> | <b>Post-hoc test**</b>    |
|----------------------------|-------------|------------------------------|--------------|---------------------------|
| #1, ISM                    | Palbociclib | 12.8 nM                      | p<0.0001     | p<0.05 for 0.005-2.5 µM   |
| #2, ISM                    | Palbociclib | 201.2 nM                     | p<0.0001     | p<0.05 for 0.125-2.5 µM   |
| #2, ISM                    | Ribociclib  | 148.3 nM                     | p = 0.0138   | p<0.05 for 0.25-2.5 µM    |
| #2, ISM                    | Abemaciclib | 109.2 nM                     | p = 0.02     | p<0.05 for 0.005-2.5 µM   |
| #3.1, ISM                  | Palbociclib | 7.2 nM                       | p<0.0001     | p<0.05 for 0.05-2.5 µM    |
| #3.1, ISM                  | Ribociclib  | 16.7 nM                      | p<0.0001     | p<0.05 for 0.025-2.5 µM   |
| #3.1, ISM                  | Abemaciclib | 4.5 nM                       | p<0.0001     | p<0.05 for 0.005-2.5 µM   |
| #3.2, ISM-AML              | Palbociclib | 40.3 nM                      | p<0.0001     | p < 0.05 for 0.025-2.5 µM |
| #3.2, ISM-AML              | Ribociclib  | 200.2 nM                     | p = 0.0004   | p<0.05 for 0.125-2.5 µM   |
| #3.2, ISM-AML              | Abemaciclib | 55.2 nM                      | p<0.0001     | p<0.05 for 0.005-2.5 µM   |
| #4.1, ISM                  | Palbociclib | 5.7 nM                       | p<0.0001     | p<0.05 for 0.01-2.5 µM    |
| #4.2, ASM                  | Palbociclib | 94.4 nM                      | p<0.0001     | p< 0.05 for 0.125-2.5 µM  |
| #4.2, ASM                  | Ribociclib  | 362.1 nM                     | p<0.0001     | p<0.05 for 0.25-2.5 µM    |
| #5, ASM-MPN-eo             | Palbociclib | 67.5 nM                      | p<0.0001     | p<0.05 for 0.05-2.5 µM    |
| #6, ASM-MDS/MPN-u          | Palbociclib | 4.2 nM                       | p<0.0001     | p<0.05 for 0.005-2.5 µM   |
| #6, ASM-MDS/MPN-u          | Ribociclib  | 75.4 nM                      | p=0.0009     | p<0.05 for 0.005-2.5 µM   |
| #6, ASM-MDS/MPN-u          | Abemaciclib | 159.4 nM                     | p<0.0001     | p<0.05 for 0.005-2.5 µM   |
| #7, ASM-MDS/MPN-u          | Palbociclib | 163.4nM                      | p<0.0001     | p<0.05 for 0.125-2.5 µM   |
| #8, ASM-AML                | Palbociclib | 181.8 nM                     | p=0.0126     | p<0.05 for 10 µM          |
| #9, MCL                    | Palbociclib | 10.4 nM                      | p<0.0001     | p<0.05 for 0.005-2.5 µM   |
| #10, MCL-MDS               | Palbociclib | 16.8 nM                      | p=0.0073     | p<0.05 for 2.5 µM         |
| #10, MCL-MDS               | Ribociclib  | 193.9 nM                     | p=0.016      | p<0.05 for 2.5 µM         |

|                     |             |          |          |                          |
|---------------------|-------------|----------|----------|--------------------------|
| #10, MCL-MDS        | Abemaciclib | 23.7 nM  | p<0.0001 | p<0.05 for 0.25-2.5 µM   |
| #11, ISM            | Palbociclib | 6.5 nM   | p<0.0001 | p<0.05 for 0.005-2.5 µM  |
| #11, ISM            | Ribociclib  | 38 nM    | p<0.0001 | p<0.05 for 0.005-2.5 µM  |
| #11, ISM            | Abemaciclib | 19.9 nM  | p<0.0001 | p<0.05 for 0.025-2.5 µM  |
| #12, ASM            | Palbociclib | 81.6 nM  | p<0.0001 | p<0.05 for 0.025-2.5 µM  |
| #12, ASM            | Ribociclib  | 119.9 nM | p<0.0001 | p<0.05 for 0.125-2.5 µM  |
| #12, ASM            | Abemaciclib | 135.4 nM | p=0.0003 | p<0.05 for 0.125-2.5 µM  |
| #13, ISM            | Palbociclib | 37 nM    | p=0.0004 | p<0.05 for 0.125-2.5 µM  |
| #13, ISM            | Ribociclib  | 261.7 nM | p<0.0001 | p<0.05 for 0.5-2.5 µM    |
| #13, ISM            | Abemaciclib | 16.9 nM  | p<0.0001 | p<0.05 for 0.005-2.5 µM  |
| #14.1, SM-CMML      | Palbociclib | 2.6 nM   | p=0.0003 | p<0.05 for 0.005-2.5 µM  |
| #14.1, SM-CMML      | Ribociclib  | 65.8 nM  | p=0.0053 | p<0.05 for 0.125-2.5 µM  |
| #14.1, SM-CMML      | Abemaciclib | 11.1 nM  | p<0.0001 | p<0.05 for 0.025-2.5 µM  |
| #14.2, SM-CMML      | Palbociclib | 0.25 nM  | p<0.0001 | p<0.05 for 0.01-2.5 µM   |
| #14.2, SM-CMML      | Ribociclib  | 408 nM   | p<0.0001 | p<0.05 for 0.1-2.5 µM    |
| #14.2, SM-CMML      | Abemaciclib | 60.4 nM  | p<0.0001 | p < 0.05 for 0.01-2.5 µM |
| #15, MCL            | Palbociclib | 43.9 nM  | p<0.0001 | p<0.05 for 0.025-2.5 µM  |
| #15, MCL            | Ribociclib  | 65.5 nM  | p<0.0001 | p<0.05 for 0.01-2.5 µM   |
| #15, MCL            | Abemaciclib | 98.4 nM  | p<0.0001 | p<0.05 for 0.025-2.5 µM  |
| #16, SM-CMML        | Palbociclib | 28.2 nM  | p<0.0001 | p<0.05 for 0.05-2.5 µM   |
| #16, SM-CMML        | Ribociclib  | 134.4 nM | p<0.0001 | p < 0.05 for 2.5 µM      |
| #16, SM-CMML        | Abemaciclib | 33.3 nM  | p<0.0001 | p<0.05 for 0.125-2.5 µM  |
| All samples (n=17*) | Palbociclib | 44.9 nM  | p<0.0001 | p<0.05 for 0.005-2.5 µM  |
| All samples (n=14)  | Ribociclib  | 158.9 nM | p<0.0001 | p<0.05 for 0.025-2.5 µM  |
| All samples (n=13)  | Abemaciclib | 57.0 nM  | p<0.0001 | p<0.05 for 0.025-2.5 µM  |

Primary neoplastic cells were incubated in various concentrations of palbociclib, ribociclib or abemaciclib at 37°C for 48 hours. Then, proliferation was determined by measuring uptake of <sup>3</sup>H-thymidine and IC<sub>50</sub> values were calculated from triplicates. Mean values were calculated for all samples tested for each drug (“All samples”; \*in case of palbociclib, 3 out of 20 samples tested could not be considered as different drug-concentrations were tested in these samples). To compare the dose effect of different dose levels, we used ANOVA. \*\*Post-testing was performed by Dunnett-test; p<0.05 is considered statistically significant. Abbreviations: IC<sub>50</sub>, half maximal inhibitory concentration; nM: nanomolar; μM: micromolar. Patients’ numbers (#) refer to table 1 in the main manuscript.

**Supplemental Table S9**

**Cooperative (synergistic or additive) effects between CDK4/CDK6 inhibitors and KIT D816V targeting TKI on proliferation of human MC lines as assessed by <sup>3</sup>H-thymidine uptake experiments**

| <b>Cell line</b>          | <b>D1 + D2 combination</b> | <b>Range D1 (nM)</b> | <b>Range D2 (nM)</b> | <b>Ratio</b> | <b>CI value</b>                         | <b>ZIP score</b> |
|---------------------------|----------------------------|----------------------|----------------------|--------------|-----------------------------------------|------------------|
| HMC-1.1                   | palbociclib + midostaurin  | 90-120               | 315-200              | 1:3.5        | CI<1 for all conc. tested               | 15.27            |
| HMC-1.2                   | palbociclib + midostaurin  | 170-200              | 153-180              | 1:0.9        | CI < 1 for '200+180 nM'                 | 14.14            |
| ROSA <sup>KIT WT</sup>    | palbociclib + midostaurin  | 45-75                | 108 -180             | 1:2.4        | CI<1 for all conc. $\geq$ '65+156 nM'   | 1.96             |
| ROSA <sup>KIT D816V</sup> | palbociclib + midostaurin  | 90-120               | 198-264              | 1:2.2        | CI<1 for all conc. tested               | 17.52            |
| HMC-1.1                   | ribociclib + midostaurin   | 170-200              | 340-400              | 1:2          | CI<1 for all conc. tested               | 6.52             |
| HMC-1.2                   | ribociclib + midostaurin   | 125-155              | 137.5-170.5          | 1:1.1        | CI<1 for all conc. tested               | 6.98             |
| ROSA <sup>KIT WT</sup>    | ribociclib + midostaurin   | 35-65                | 101.5-188.5          | 1:2.9        | CI<1 for all conc. $\geq$ '45+130.5 nM' | 3.08             |
| ROSA <sup>KIT D816V</sup> | ribociclib + midostaurin   | 145-175              | 159.5-192.5          | 1:1.1        | CI<1 for all conc. tested               | 19.28            |
| HMC-1.1                   | abemaciclib + midostaurin  | 90-120               | 315-420              | 1:3.5        | CI<1 for all conc. tested               | 27.12            |
| HMC-1.2                   | abemaciclib + midostaurin  | 5-11                 | 60-132               | 1:12         | CI<1 for all conc. $\geq$ '7+84 nM'     | 2.11             |
| ROSA <sup>KIT WT</sup>    | abemaciclib + midostaurin  | 25-40                | 100-160              | 1:4          | CI<1 for all conc. $\geq$ '35+140 nM'   | -3.62            |
| ROSA <sup>KIT D816V</sup> | abemaciclib + midostaurin  | 30-60                | 90-180               | 1:3          | CI<1 for all conc. $\geq$ '40+120 nM'   | 15.67            |
| MCPV-1.1                  | palbociclib + midostaurin  | 5000-5600            | 500-560              | 1:0.1        | CI<1 for all conc. tested               | 2.64             |
| MCPV-1.2                  | palbociclib + midostaurin  | 5000-5600            | 500-560              | 1:0.1        | CI<1 for all conc. tested               | 49.13            |
| MCPV-1.1                  | ribociclib + midostaurin   | 7500-8400            | 500-560              | 15:1         | CI<1 for all conc. tested               | 18.35            |
| MCPV-1.2                  | ribociclib + midostaurin   | 7500-8400            | 500-560              | 15:1         | CI<1 for '780+520 nM'                   | 20.5             |
| MCPV-1.1                  | abemaciclib + midostaurin  | 700-1300             | 700-1300             | 1:1          | CI<1 for '700+700 nM'                   | 3.18             |
| MCPV-1.2                  | abemaciclib + midostaurin  | 700-1300             | 700-1300             | 1:1          | CI<1 for '700+700 nM'                   | -0.76            |
| HMC-1.1                   | palbociclib + avapritinib  | 100-130              | 200-260              | 1:2          | CI<1 for all conc. tested               | 24.07            |
| HMC-1.2                   | palbociclib + avapritinib  | 170-200              | 170-200              | 1:1          | CI<1 for all conc. tested               | 14.76            |

|                           |                           |          |            |         |                                         |       |
|---------------------------|---------------------------|----------|------------|---------|-----------------------------------------|-------|
| ROSA <sup>KIT WT</sup>    | palbociclib + avapritinib | 10-40    | 20-80      | 1:2     | CI<1 for all conc. tested               | -4.06 |
| ROSA <sup>KIT D816V</sup> | palbociclib + avapritinib | 30-60    | 90-180     | 1:3     | CI<1 for all conc. tested               | 14.60 |
| HMC-1.1                   | ribociclib + avapritinib  | 120-150  | 240-300    | 1:2     | CI<1 for all conc. tested               | 33.42 |
| HMC-1.2                   | ribociclib + avapritinib  | 25-55    | 62.5-137.5 | 1:2.5   | CI<1 for all conc. tested               | 14.87 |
| ROSA <sup>KIT WT</sup>    | ribociclib + avapritinib  | 10-40    | 20-80      | 1:2     | CI<1 for all conc. tested               | -4.99 |
| ROSA <sup>KIT D816V</sup> | ribociclib + avapritinib  | 50-80    | 50-80      | 1:1     | CI<1 for all conc. $\geq$ '65+65 nM'    | -2.41 |
| HMC-1.1                   | abemaciclib + avapritinib | 25-55    | 62.5-137.5 | 1:2.5   | CI<1 for all conc. tested               | 14.24 |
| HMC-1.2                   | abemaciclib + avapritinib | 5-11     | 75-165     | 1:15    | CI<1 for all conc. tested               | 14.52 |
| ROSA <sup>KIT WT</sup>    | abemaciclib + avapritinib | 15-45    | 22.5-67.5  | 1:1.5   | CI<1 for all conc. tested               | -0.59 |
| ROSA <sup>KIT D816V</sup> | abemaciclib + avapritinib | 30-60    | 90-180     | 1:3     | CI<1 for all conc. tested               | 1.83  |
| HMC-1.1                   | palbociclib + nintedanib  | 90-120   | 3.6-4.8    | 1:0.04  | CI<1 for all conc. tested               | 46.72 |
| HMC-1.2                   | palbociclib + nintedanib  | 100-130  | 500-650    | 1:5     | CI<1 for all conc. $\geq$ '110+550 nM'  | 11.6  |
| ROSA <sup>KIT WT</sup>    | palbociclib + nintedanib  | 100-130  | 10-13      | 1:0.1   | CI<1 for all conc. tested               | 22.21 |
| ROSA <sup>KIT D816V</sup> | palbociclib + nintedanib  | 80-110   | 560-770    | 1:7     | CI<1 for all conc. tested               | 6.47  |
| HMC-1.1                   | ribociclib + nintedanib   | 90-120   | 3.6-4.8    | 1:0.04  | CI<1 for all conc. tested               | 27.86 |
| HMC-1.2                   | ribociclib + nintedanib   | 100-130  | 500-650    | 1:5     | CI>1 for all conc. tested               | 7.03  |
| ROSA <sup>KIT WT</sup>    | ribociclib + nintedanib   | 100-130  | 10-13      | 1:0.1   | CI<1 for all conc. tested               | 7.54  |
| ROSA <sup>KIT D816V</sup> | ribociclib + nintedanib   | 70-100   | 700-1000   | 1:10    | CI>1 for all conc. tested               | 17.68 |
| HMC-1.1                   | abemaciclib + nintedanib  | 120-150  | 3-3.75     | 1:0.025 | CI<1 for all conc. tested               | 32.03 |
| HMC-1.2                   | abemaciclib + nintedanib  | 70-100   | 700-1000   | 1:10    | CI<1 for all conc. tested               | 26.51 |
| ROSA <sup>KIT WT</sup>    | abemaciclib + nintedanib  | 25-55    | 15-45      | 1:0.6   | CI<1 for all conc. tested               | 21.57 |
| ROSA <sup>KIT D816V</sup> | abemaciclib + nintedanib  | 70-100   | 700-1000   | 1:10    | CI<1 for all conc. $\leq$ '100+1000 nM' | 38.33 |
| MCPV-1.1                  | abemaciclib + avapritinib | 700-1300 | 700-1300   | 1:1     | CI<1 for all conc. tested               | 11.99 |
| MCPV-1.2                  | abemaciclib + avapritinib | 700-1300 | 700-1300   | 1:1     | CI<1 for all conc. tested               | 18.28 |
| MCPV-1.3                  | abemaciclib + avapritinib | 700-1300 | 700-1300   | 1:1     | CI<1 for all conc. tested               | 11.94 |

|          |                              |          |          |       |                                           |       |
|----------|------------------------------|----------|----------|-------|-------------------------------------------|-------|
| MCPV-1.4 | abemaciclib +<br>avapritinib | 700-1300 | 700-1300 | 1:1   | CI<1 for all conc. $\geq$<br>'900+900 nM' | 16.20 |
| MCPV-1.1 | abemaciclib +<br>nintedanib  | 700-1300 | 350-650  | 0:0.5 | CI<1 for all conc.<br>$\geq$ '800+400 nM' | 21.44 |
| MCPV-1.2 | abemaciclib +<br>nintedanib  | 700-1300 | 350-650  | 0:0.5 | CI<1 for all conc.<br>tested              | 18.99 |
| MCPV-1.3 | abemaciclib +<br>nintedanib  | 700-1300 | 350-650  | 0:0.5 | CI<1 for all conc.<br>$\geq$ '900+450 nM' | 9.28  |
| MCPV-1.4 | abemaciclib +<br>nintedanib  | 700-1300 | 350-650  | 0:0.5 | CI<1 for all conc.<br>tested              | 22.86 |

For evaluation of potential cooperative (synergistic or additive) drug-effects, cell lines were incubated in various two-drug-combinations (as described in the main document) each involving a CDK4/CDK6 inhibitor (palbociclib, ribociclib or abemaciclib) and a KIT D816V-TKI (midostaurin, avapritinib or nintedanib) at a fixed ratio. Proliferation was determined by measuring uptake of  $^3\text{H}$ -thymidine. Drug interaction-types were determined by 2 different methods. Combination index (CI) values were determined using Calcsyn software. A CI of <1 indicates a synergistic effect, whereas as CI of >1 indicates antagonism. Furthermore, the type of drug combination effects was analyzed by calculating synergy scores (zero interaction potency, ZIP) by SynergyfinderPlus software. A synergy score >10 stands for synergism, a synergy score between -10 and 10 for an additive effect and a synergy score <-10 stands for antagonism. Abbreviations: D: drug; nM: nanomolar; conc.: concentrations; CI: combination index; ZIP: zero interaction potency.

**Supplemental Table S10**

**Cooperative (synergistic or additive) effects between CDK4/CDK6 inhibitors and KIT D816V targeting TKI on induction of apoptosis in human MC lines as assessed by flow cytometry**

| Cell line                 | D1          | D2          | Range D1 (μM) | Range D2 (μM) | ZIP score |
|---------------------------|-------------|-------------|---------------|---------------|-----------|
| HMC-1.1                   | palbociclib | midostaurin | 0.5-2.0       | 0.3-0.5       | 15.68     |
| HMC-1.2                   | palbociclib | midostaurin | 4.0-8.0       | 0.3-0.5       | 11.63     |
| ROSA <sup>KIT WT</sup>    | palbociclib | midostaurin | 1.0-5.0       | 0.3-0.5       | -5.21     |
| ROSA <sup>KIT D816V</sup> | palbociclib | midostaurin | 0.5-2.0       | 0.1-0.4       | 4.93      |
| HMC-1.2                   | abemaciclib | midostaurin | 2.0-4.0       | 0.3-0.5       | 25.41     |
| HMC-1.2                   | abemaciclib | avapritinib | 2.0-4.0       | 0.3-0.5       | 14.54     |
| ROSA <sup>KIT D816V</sup> | abemaciclib | midostaurin | 2.0-3.0       | 0.3-0.5       | -0.46     |
| ROSA <sup>KIT D816V</sup> | abemaciclib | avapritinib | 2.0-3.0       | 0.5-0.7       | 4.07      |

For evaluation of potential cooperative (synergistic or additive) drug-effects on induction of apoptosis, cell lines were incubated in various two-drug-combinations involving each a CDK4/CDK6 inhibitor (palbociclib or abemaciclib) and a KIT D816V-TKI (midostaurin or avapritinib) at 37°C for 72 hours. Then, the percentage of apoptotic cells was determined by flow cytometry. Furthermore, the type of drug combination effects was analyzed by calculating synergy scores (zero interaction potency, ZIP) by SynergyfinderPlus software. A ZIP score >10 stands for synergism, a ZIP score between -10 and 10 for an additive effect and a ZIP score <-10 stands for antagonism. Abbreviations: D: drug; μM: micromolar.

#### IV. Supplemental Figures

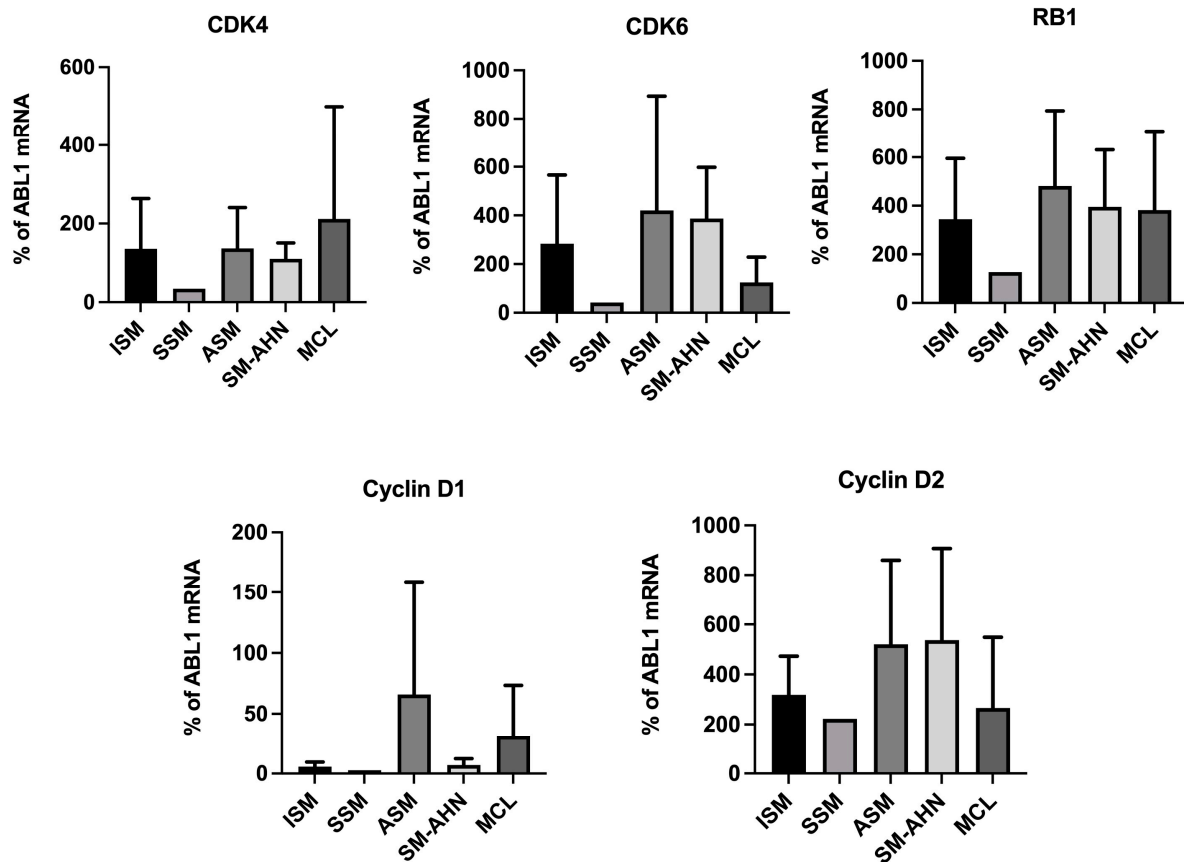

Schneeweiss-Gleixner et al., Supplemental Figure S1A

#### Detection of CDK4, CDK6, RB1, Cyclin D1 and D2 mRNA in neoplastic cells obtained from patients with non-advanced SM (ISM, SSM) and advanced SM.

Primary neoplastic cells (mononuclear cells enriched with Ficoll) from the bone marrow of 50 patients with SM (ISM: n=27; SSM: n=1; ASM: n=5; SM-AHN: n=11; MCL: n=6) patients were subjected to RNA isolation and examined for expression of CDK4, CDK6, RB1, Cyclin D1 and Cyclin D2 mRNA by qPCR. Transcript levels were calculated as percent of ABL1 mRNA. Abbreviations: SM, systemic mastocytosis; ISM, indolent SM; SSM, smoldering SM; ASM, aggressive SM; SM-AHN, SM with an associated hematologic neoplasm; MCL, mast cell leukemia; CDK, cyclin-dependent kinase; RB1, retinoblastoma protein 1.

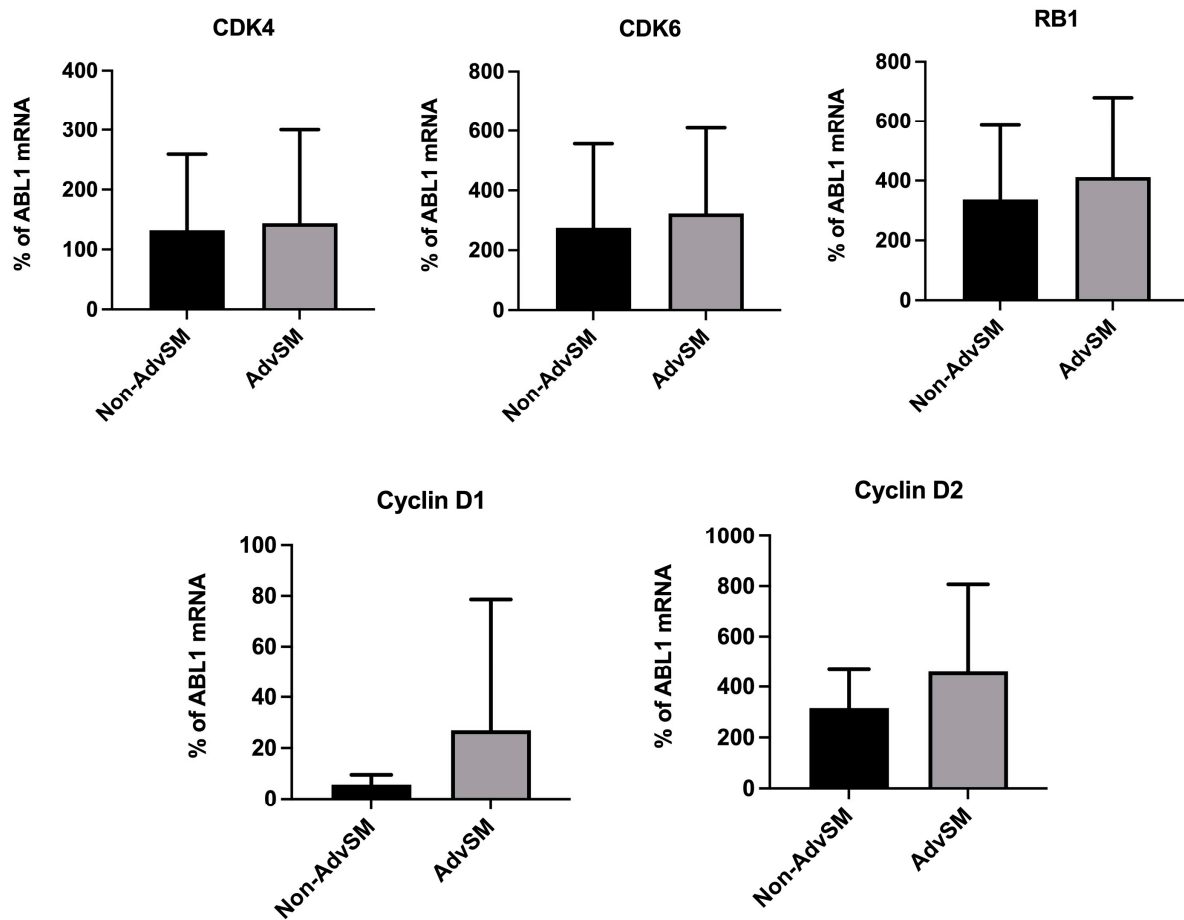

Schneeweiss-Gleixner et al., Supplemental Figure S1B

### Detection of CDK4, CDK6, RB1, Cyclin D1 and D2 mRNA in neoplastic cells in non-advanced SM and advanced SM.

Primary neoplastic cells from the bone marrow of 50 patients with SM (ISM: n=27; SSM: n=1; ASM: n=5; SM-AHND: n=11; MCL: n=6) were subjected to RNA isolation and examined for expression of Cyclin D1, Cyclin D2, CDK4, and CDK6 mRNA levels by qPCR. Transcript levels were calculated as percent of ABL1 mRNA. Patient were categorized as non-advanced SM (Non-AdvSM: ISM and SSM) and advanced SM (AdvSM: ASM, SM-AHN, MCL). Abbreviations: SM, systemic mastocytosis; ISM, indolent SM; SSM, smoldering SM; ASM, aggressive SM; SM-AHN, SM with an associated hematologic neoplasm; MCL, mast cell leukemia; CDK, cyclin-dependent kinase; RB1, retinoblastoma protein 1.

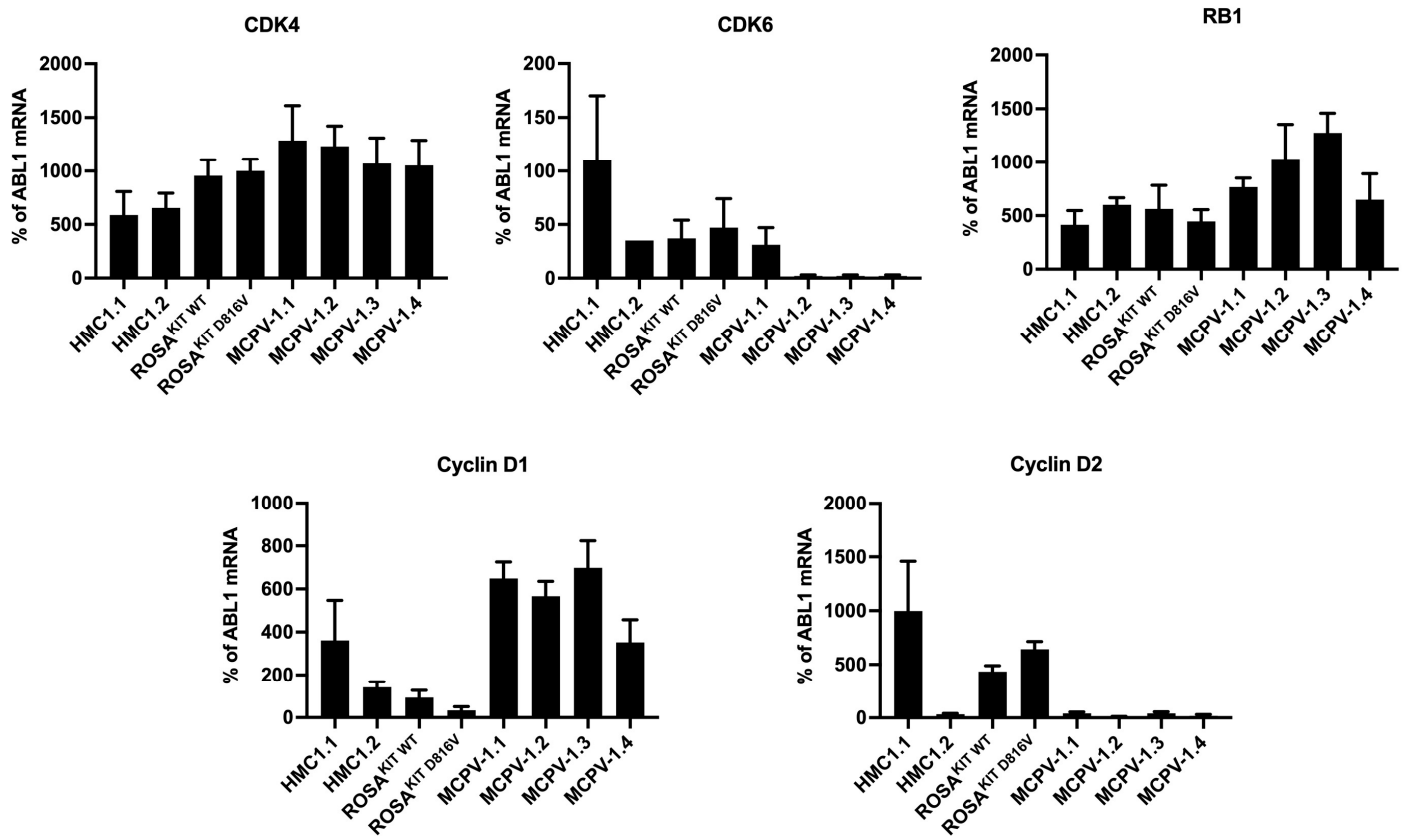

Schneeweiss-Gleixner et al., Supplemental Figure S1C

### Expression of mRNA transcripts of molecules involved in cell cycle progression in human mast cell lines.

Mast cell lines (HMC-1, ROSA and MCPV-1) (B) were subjected to RNA isolation and examined for expression of Cyclin D1, Cyclin D2, CDK4 and CDK6 mRNA by qPCR. Transcript levels were calculated and expressed as percent of ABL1 mRNA. Abbreviations: CDK, cyclin-dependent kinase; RB1, retinoblastoma protein 1.

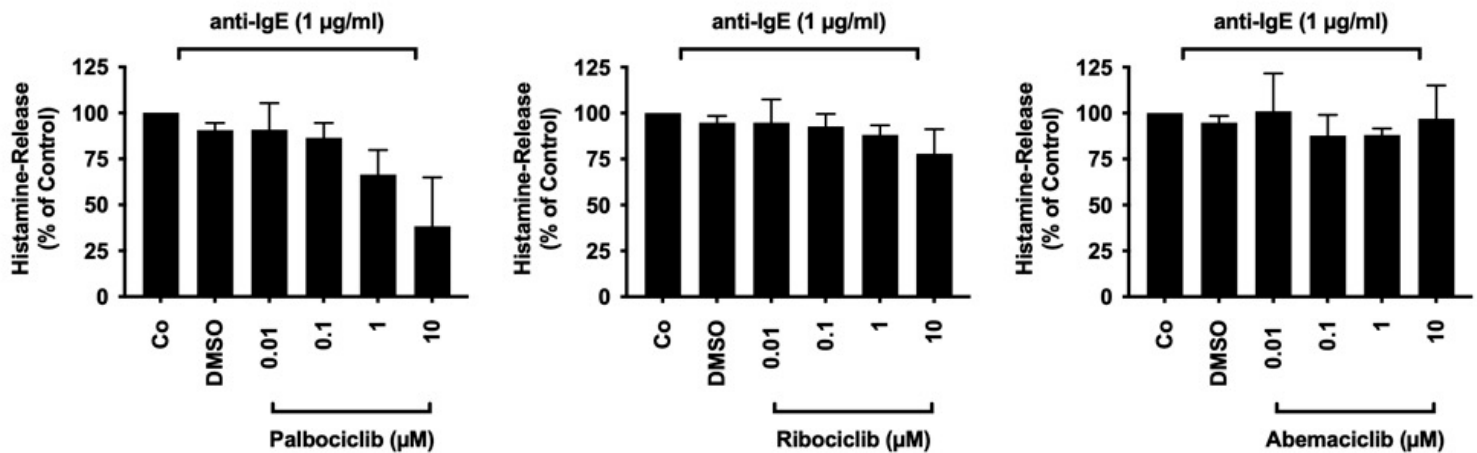

Schneeweiss-Gleixner et al., Supplemental Figure S2

### Effects of CDK4/CDK6 inhibitors on anti-IgE-induced histamine release in human blood basophils.

Primary blood basophils obtained from healthy donors were incubated in control medium or in various concentrations of palbociclib, ribociclib, or abemaciclib as indicated, at 37°C for 30 minutes. Thereafter, cells were incubated in control buffer or in buffer containing anti-IgE antibody E-124.2.8 (1 µg/ml) at 37°C for 30 minutes. After incubation, cells were centrifuged at 4°C, and cell-free supernatants and cell suspensions recovered and examined for histamine content by RIA. Histamine release was calculated as percent of total (cellular+extracellular) histamine and is expressed as percent of control.

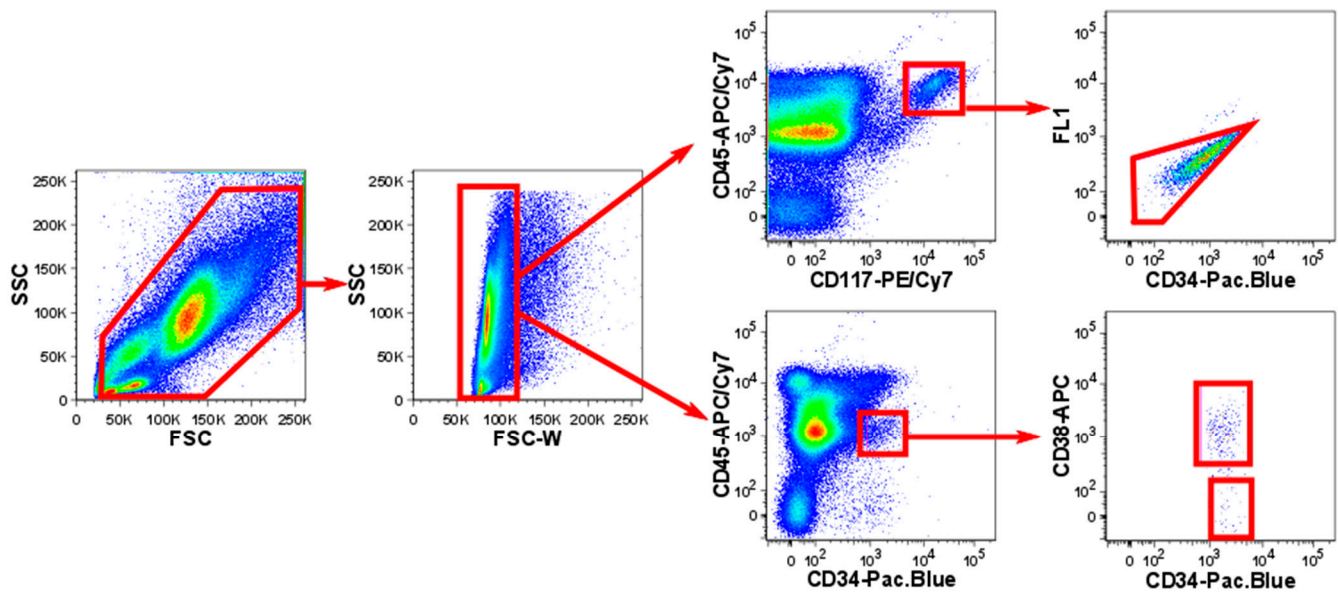

Schneeweiss-Gleixner et al., Supplemental Figure S3

### Gating strategy for identification of mast cells and leukemic stem and progenitor cells.

Heparinized bone marrow cells (BM) were obtained from 4 patients with advanced SM (ASM, n=1; ASM-AHN, n=3). The figure shows an example of gating of BM cells in a patient with ASM where the bulk of leukemic cells was analyzed for visualization of KIT<sup>+</sup> mast cells and of CD34<sup>+</sup> stem- and progenitor cells. The sequential gating strategy is indicated by red arrows. First, non-viable cells and doublets were excluded to define pure populations of viable cells (first and second panel from left). Mast cells were identified by their expression of CD45 and KIT; in a next step, auto-fluorescent cells and CD34<sup>+</sup> (stem and progenitor) cells were excluded (upper right panel). Stem- and progenitor cells were gated as CD34<sup>+</sup> and CD45 dim-positive cells (lower panels). Thereafter, cells were selected according to their expression of CD38 (progenitor cells) or lack of CD38 (stem cells) (lower right panel). Abbreviations: APC, allophycocyanin; Cy7, Cyanine-7; PE, phycoerythrin; Pac. Blue, Pacific Blue; FSC, forward scatter; FSC-W, FSC signal-width; SSC, side scatter. Figure adapted from Eisenwort et. al, Leukemia 2019 (supplemental reference S10).

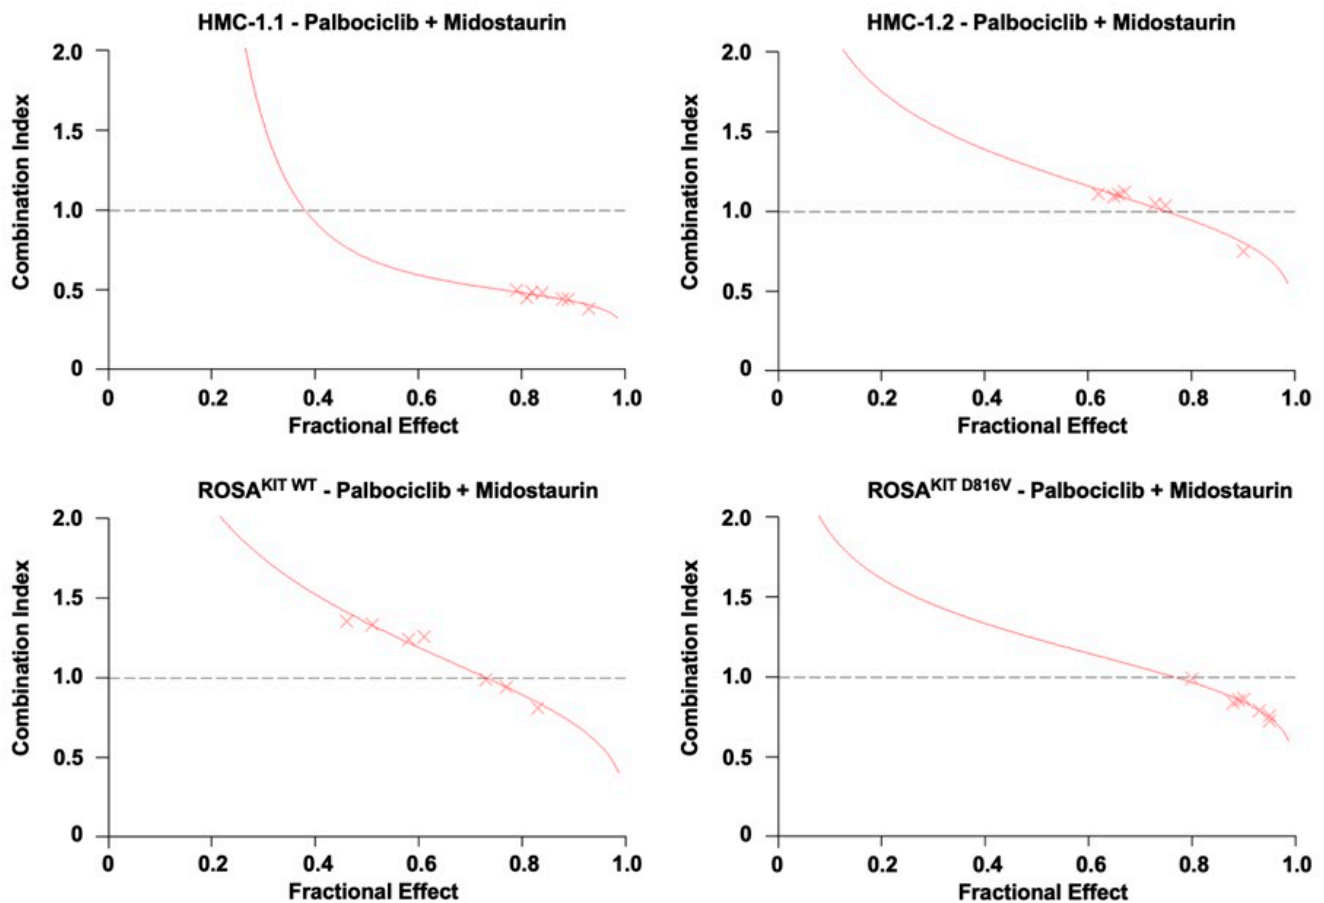

Schneeweiss-Gleixner et al., Supplemental Figure S4A

### Synergistic effects of palbociclib and midostaurin applied in combination in MCL-like cell lines as determined by Calcsyn software

HMC-1.1, HMC-1.2, ROSA<sup>KIT WT</sup> and ROSA<sup>KIT D816V</sup> were kept in control medium or in various concentrations of palbociclib, midostaurin or a combination of both drugs at a fixed ratio at 37°C for 48 hours. Thereafter, cell proliferation was determined by measuring <sup>3</sup>H-thymidine uptake as shown in Figure 5A in the main document. The nature of drug interaction (additive versus synergistic) was determined for each experiment by calculating combination index (CI) values using Calcsyn software. The resulting CI values are shown. A CI value of 1 indicates an additive effect, whereas CI values below 1 indicate synergistic drug effects.

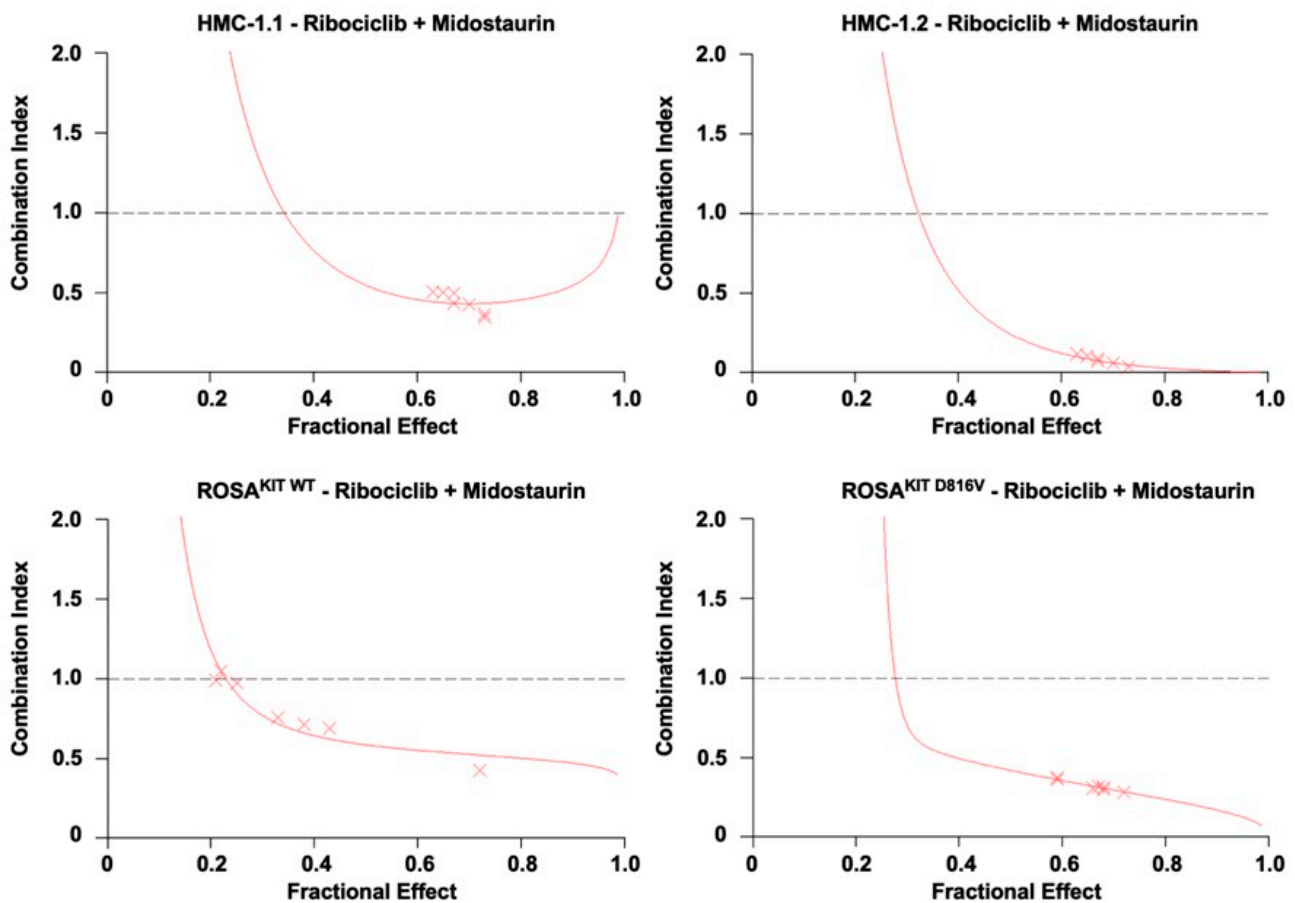

Schneeweiss-Gleixner et al., Supplemental Figure S4B

### Synergistic effects of ribociclib and midostaurin applied in combination in MCL-like cell lines as determined by Calcosyn software

HMC-1.1, HMC-1.2, ROSA<sup>KIT WT</sup> and ROSA<sup>KIT D816V</sup> were kept in control medium or in various concentrations of ribociclib, midostaurin or a combination of both drugs at a fixed ratio at 37°C for 48 hours. Thereafter, cell proliferation was determined by measuring <sup>3</sup>H-thymidine uptake as shown in Figure 5B in the main document. The nature of drug interaction (additive versus synergistic) was determined for each experiment by calculating combination index (CI) values using Calcosyn software. The resulting CI values are shown. A CI value of 1 indicates an additive effect, whereas CI values below 1 indicate synergistic drug effects.

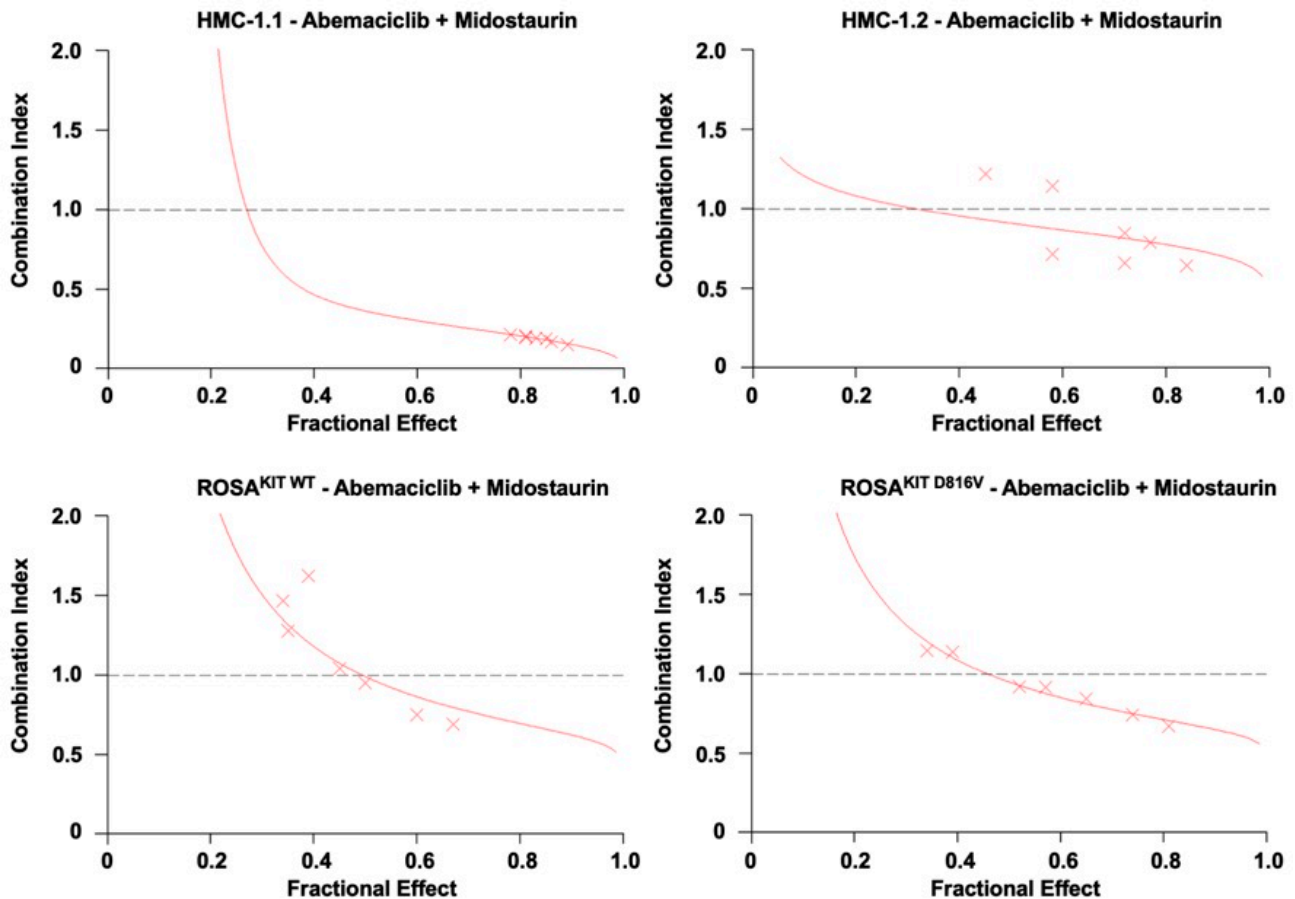

Schneeweiss-Gleixner et al., Supplemental Figure S4C

### Synergistic effects of abemaciclib and midostaurin applied in combination in MCL-like cell lines as determined by Calcsyn software

HMC-1.1, HMC-1.2, ROSA<sup>KIT WT</sup> and ROSA<sup>KIT D816V</sup> were kept in control medium or in various concentrations of abemaciclib, midostaurin or a combination of both drugs at a fixed ratio at 37°C for 48 hours. Thereafter, cell proliferation was determined by measuring <sup>3</sup>H-thymidine uptake as shown in Figure 5C in the main document. The nature of drug interaction (additive versus synergistic) was determined for each experiment by calculating combination index (CI) values using Calcsyn software. The resulting CI values are shown. A CI value of 1 indicates an additive effect, whereas CI values below 1 indicate synergistic drug effects.

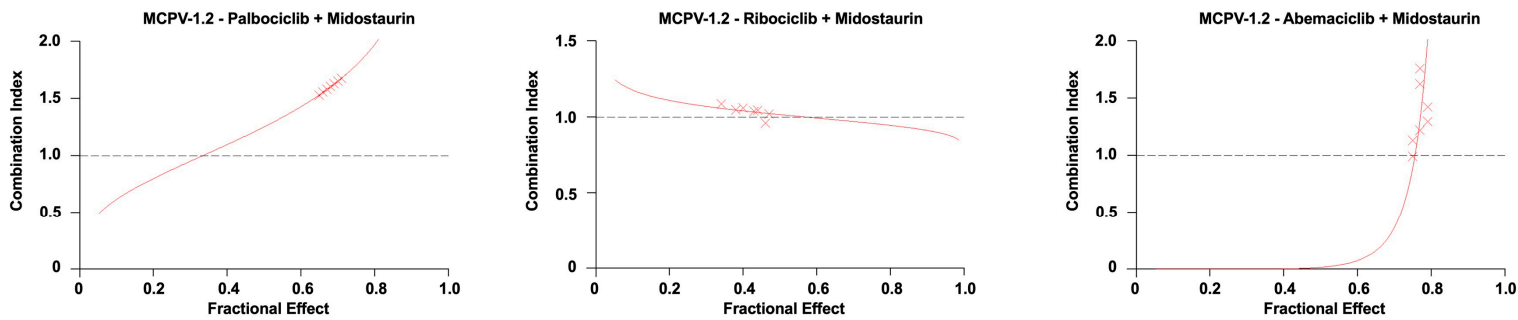

**Schneeweiss-Gleixner et al., Supplemental Figure S4D**

**Synergistic effects of CDK4/CDK6 inhibitors and midostaurin applied in combination in highly resistant MCPV-1 cells as determined by Calcosyn software**

MCPV-1.2 cells were kept in control medium or in various concentrations of palbociclib, ribociclib, abemaciclib and midostaurin alone or as drug combination with midostaurin (as indicated) at a fixed ratio at 37°C for 48 hours. Thereafter, cell proliferation was determined by measuring  $^3\text{H}$ -thymidine uptake as shown in Figure 5F in the main document. The nature of drug interaction (additive versus synergistic) was determined for each experiment by calculating combination index (CI) values using Calcosyn software. The resulting CI values are shown. A CI value of 1 indicates an additive effect, whereas CI values below 1 indicate synergistic drug effects.

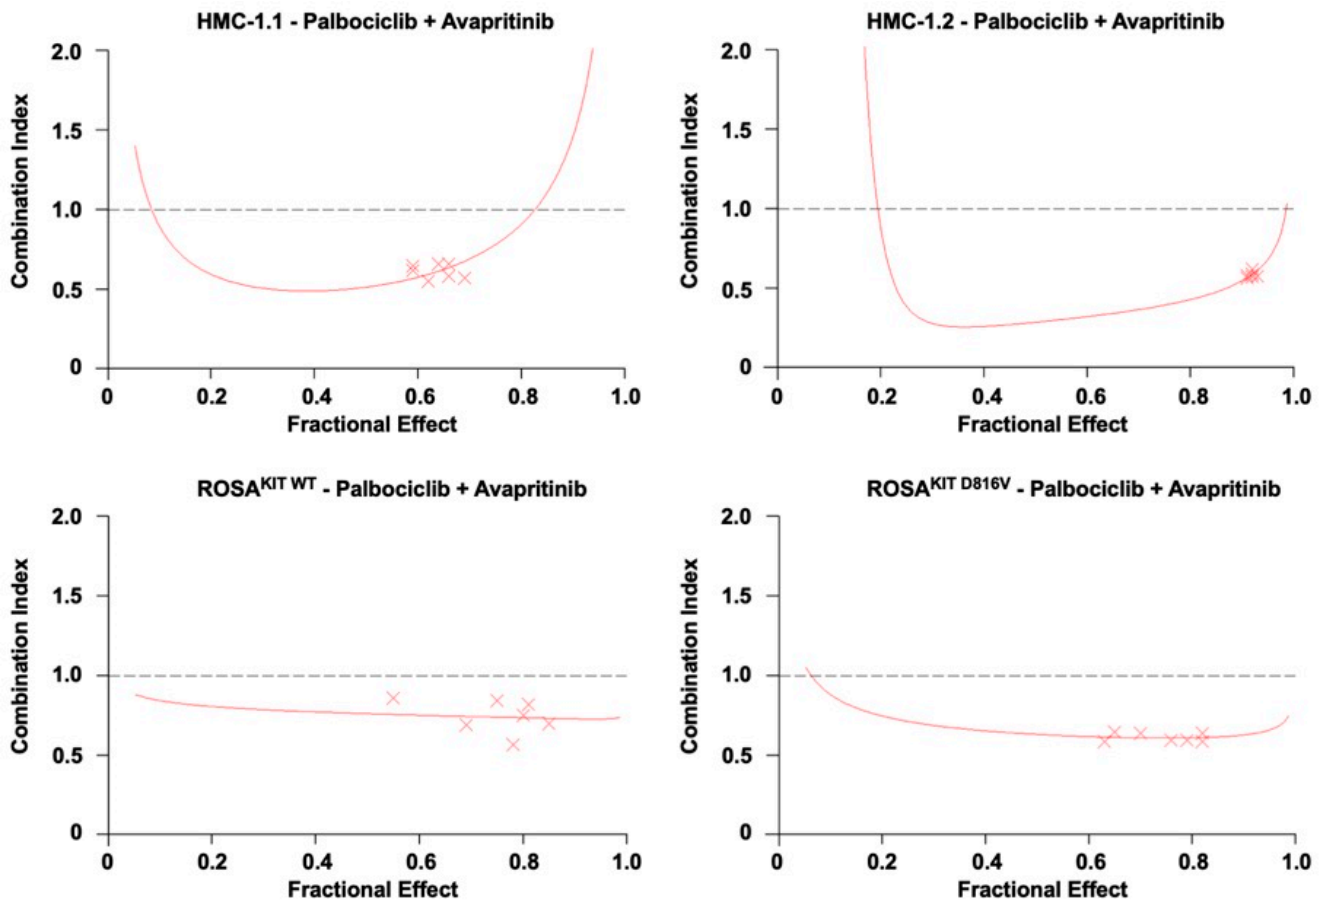

Schneeweiss-Gleixner et al., Supplemental Figure S5A

### Synergistic effects of palbociclib and avapritinib applied in combination in MCL-like cell lines as determined by Calcusyn software

HMC-1.1, HMC-1.2, ROSA<sup>KIT</sup> WT and ROSA<sup>KIT</sup> D816V were kept in control medium or in various concentrations of palbociclib, avapritinib or a combination of both drugs at a fixed ratio at 37°C for 48 hours. Thereafter, cell proliferation was determined by measuring <sup>3</sup>H-thymidine uptake as shown in Figure 6A in the main document. The nature of drug interaction (additive versus synergistic) was determined for each experiment by calculating combination index (CI) values using Calcusyn software. The resulting CI values are shown. A CI value of 1 indicates an additive effect, whereas CI values below 1 indicate synergistic drug effects.

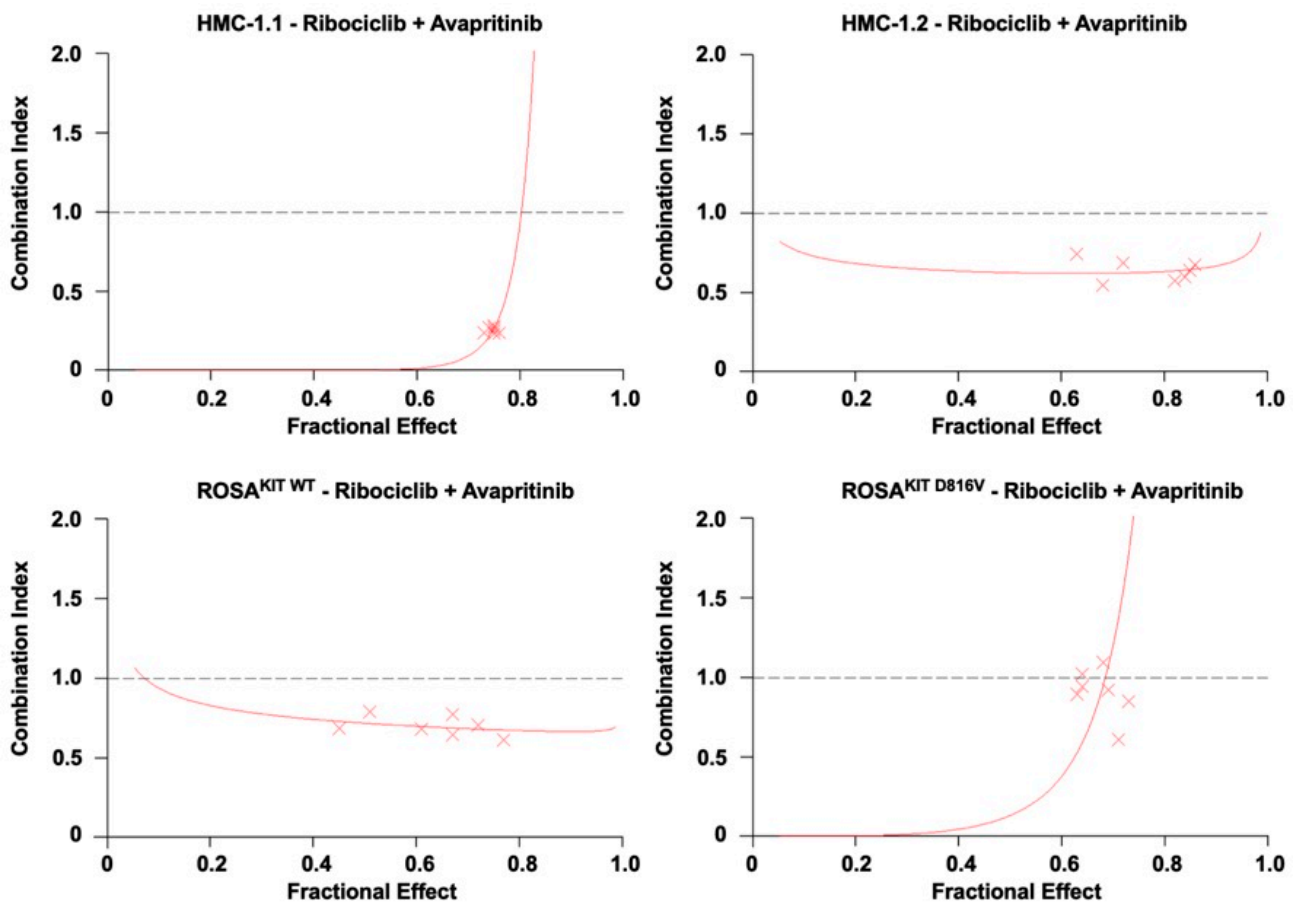

Schneeweiss-Gleixner et al., Supplemental Figure S5B

### Synergistic effects of ribociclib and avapritinib applied in combination in MCL-like cell lines as determined by CalcuSyn software

HMC-1.1, HMC-1.2, ROSA<sup>KIT WT</sup> and ROSA<sup>KIT D816V</sup> were kept in control medium or in various concentrations of ribociclib, avapritinib or a combination of both drugs at a fixed ratio at 37°C for 48 hours. Thereafter, cell proliferation was determined by measuring <sup>3</sup>H-thymidine uptake as shown in Figure 6B in the main document. The nature of drug interaction (additive versus synergistic) was determined for each experiment by calculating combination index (CI) values using CalcuSyn software. The resulting CI values are shown. A CI value of 1 indicates an additive effect, whereas CI values below 1 indicate synergistic drug effects.

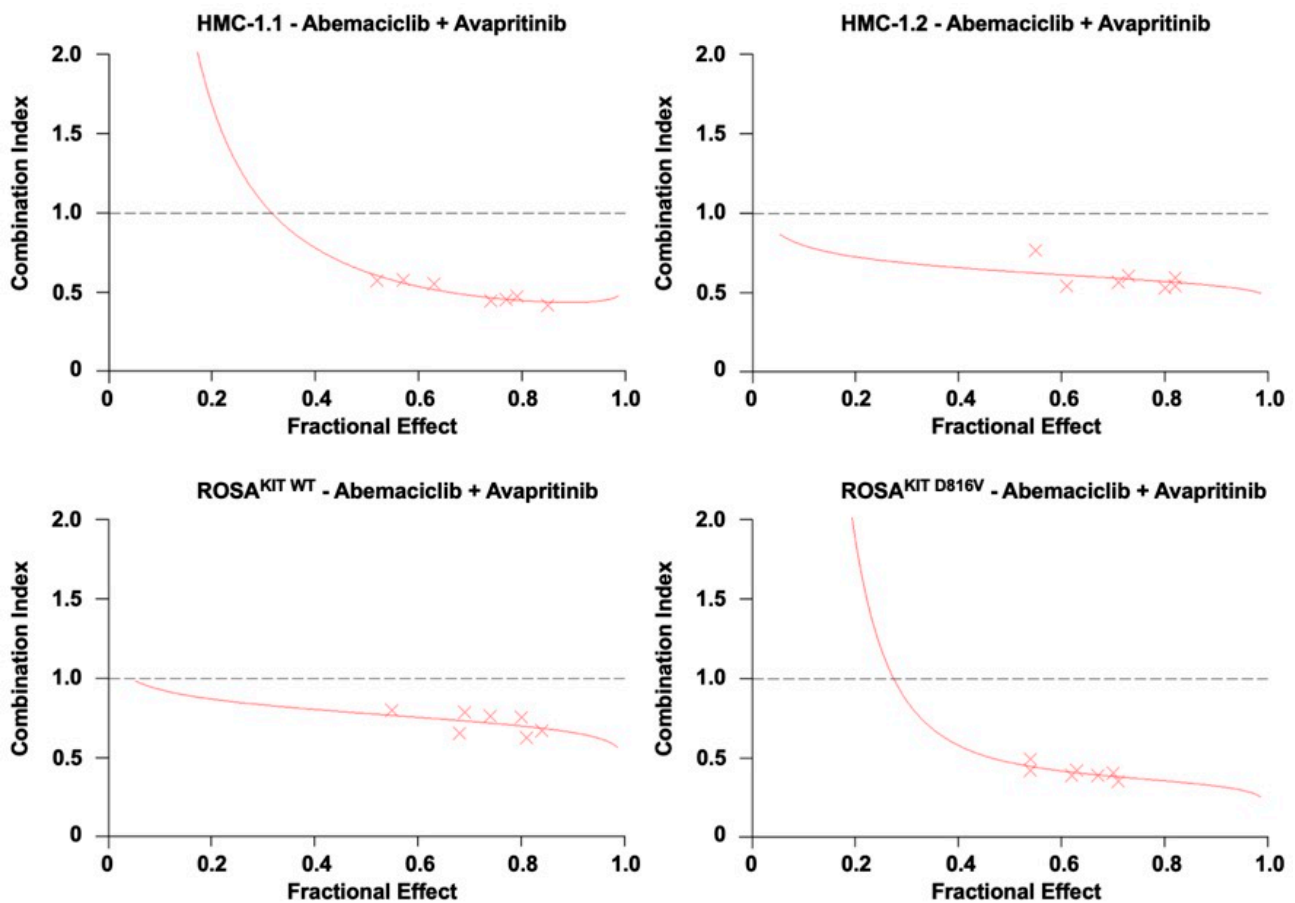

Schneeweiss-Gleixner et al., Supplemental Figure S5C

### Synergistic effects of abemaciclib and avapritinib applied in combination in MCL-like cell lines as determined by Calcsyn software

HMC-1.1, HMC-1.2, ROSA<sup>KIT WT</sup> and ROSA<sup>KIT D816V</sup> were kept in control medium or in various concentrations of abemaciclib, avapritinib or a combination of both drugs at a fixed ratio at 37°C for 48 hours. Thereafter, cell proliferation was determined by measuring <sup>3</sup>H-thymidine uptake as shown in Figure 6C in the main document. The nature of drug interaction (additive versus synergistic) was determined for each experiment by calculating combination index (CI) values using Calcsyn software. The resulting CI values are shown. A CI value of 1 indicates an additive effect, whereas CI values below 1 indicate synergistic drug effects.

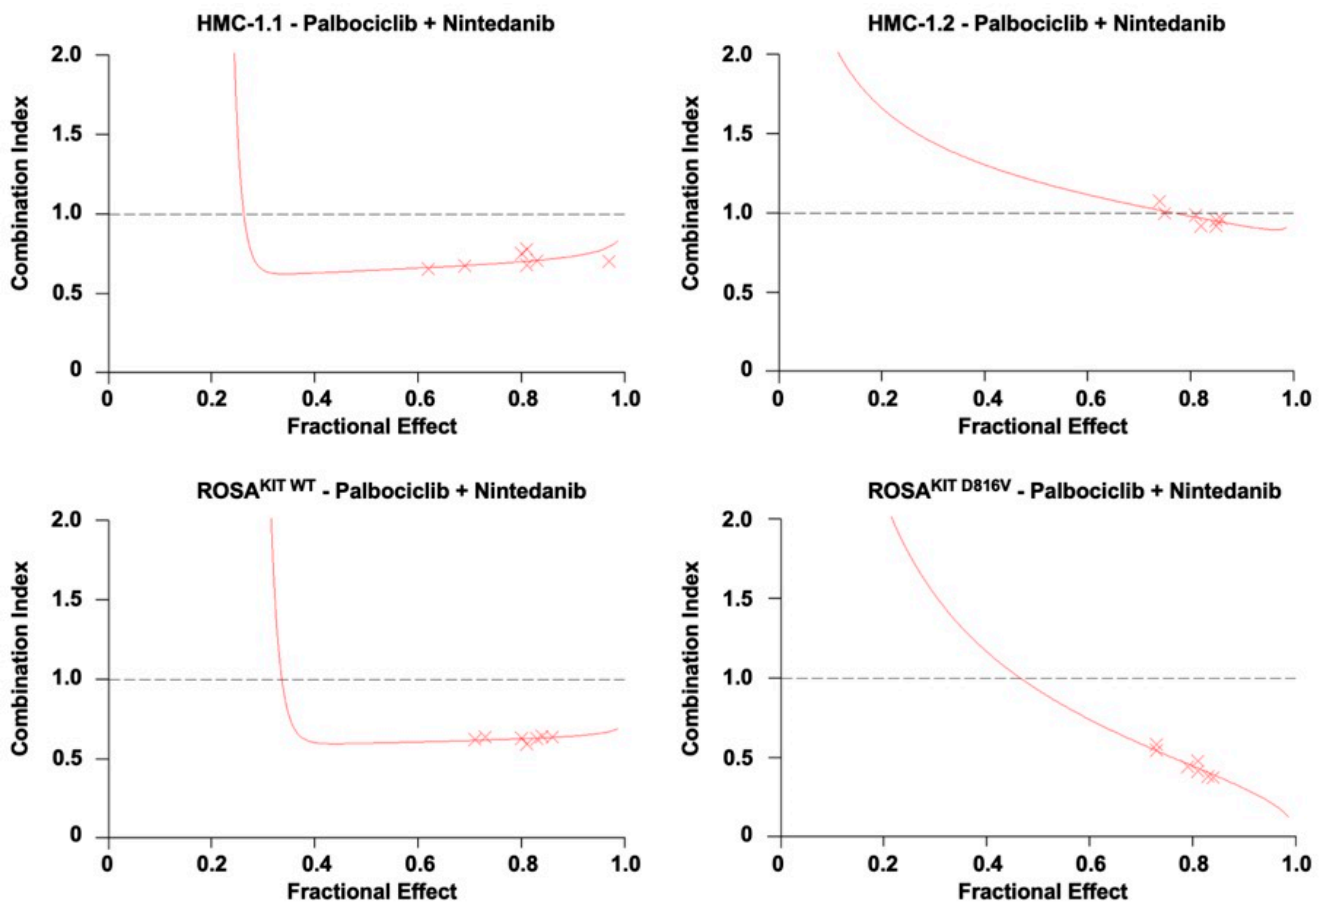

Schneeweiss-Gleixner et al., Supplemental Figure S5D

### Synergistic effects of palbociclib and nintedanib applied in combination in MCL-like cell lines as determined by Calcsyn software

HMC-1.1, HMC-1.2, ROSA<sup>KIT WT</sup> and ROSA<sup>KIT D816V</sup> were kept in control medium or in various concentrations of palbociclib, nintedanib or a combination of both drugs at a fixed ratio at 37°C for 48 hours. Thereafter, cell proliferation was determined by measuring <sup>3</sup>H-thymidine uptake as shown in Figure 6D in the main document. The nature of drug interaction (additive versus synergistic) was determined for each experiment by calculating combination index (CI) values using Calcsyn software. The resulting CI values are shown. A CI value of 1 indicates an additive effect, whereas CI values below 1 indicate synergistic drug effects.

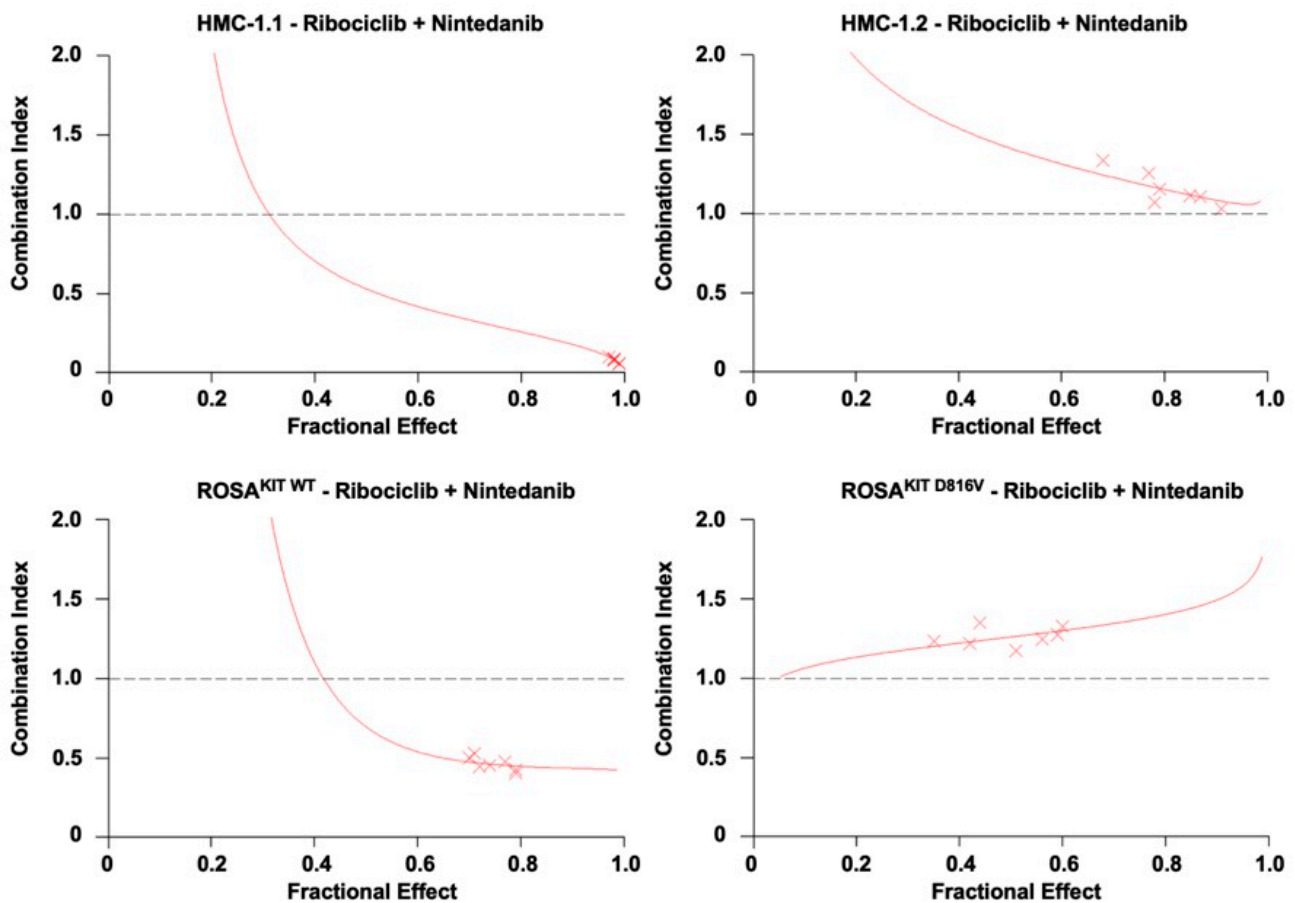

Schneeweiss-Gleixner et al., Supplemental Figure S5E

### Synergistic effects of ribociclib and nintedanib applied in combination in MCL-like cell lines as determined by CalcuSyn software

HMC-1.1, HMC-1.2, ROSA<sup>KIT WT</sup> and ROSA<sup>KIT D816V</sup> were kept in control medium or in various concentrations of ribociclib, nintedanib or a combination of both drugs at a fixed ratio at 37°C for 48 hours. Thereafter, cell proliferation was determined by measuring <sup>3</sup>H-thymidine uptake as shown in Figure 6E in the main document. The nature of drug interaction (additive versus synergistic) was determined for each experiment by calculating combination index (CI) values using CalcuSyn software. The resulting CI values are shown. A CI value of 1 indicates an additive effect, whereas CI values below 1 indicate synergistic drug effects.

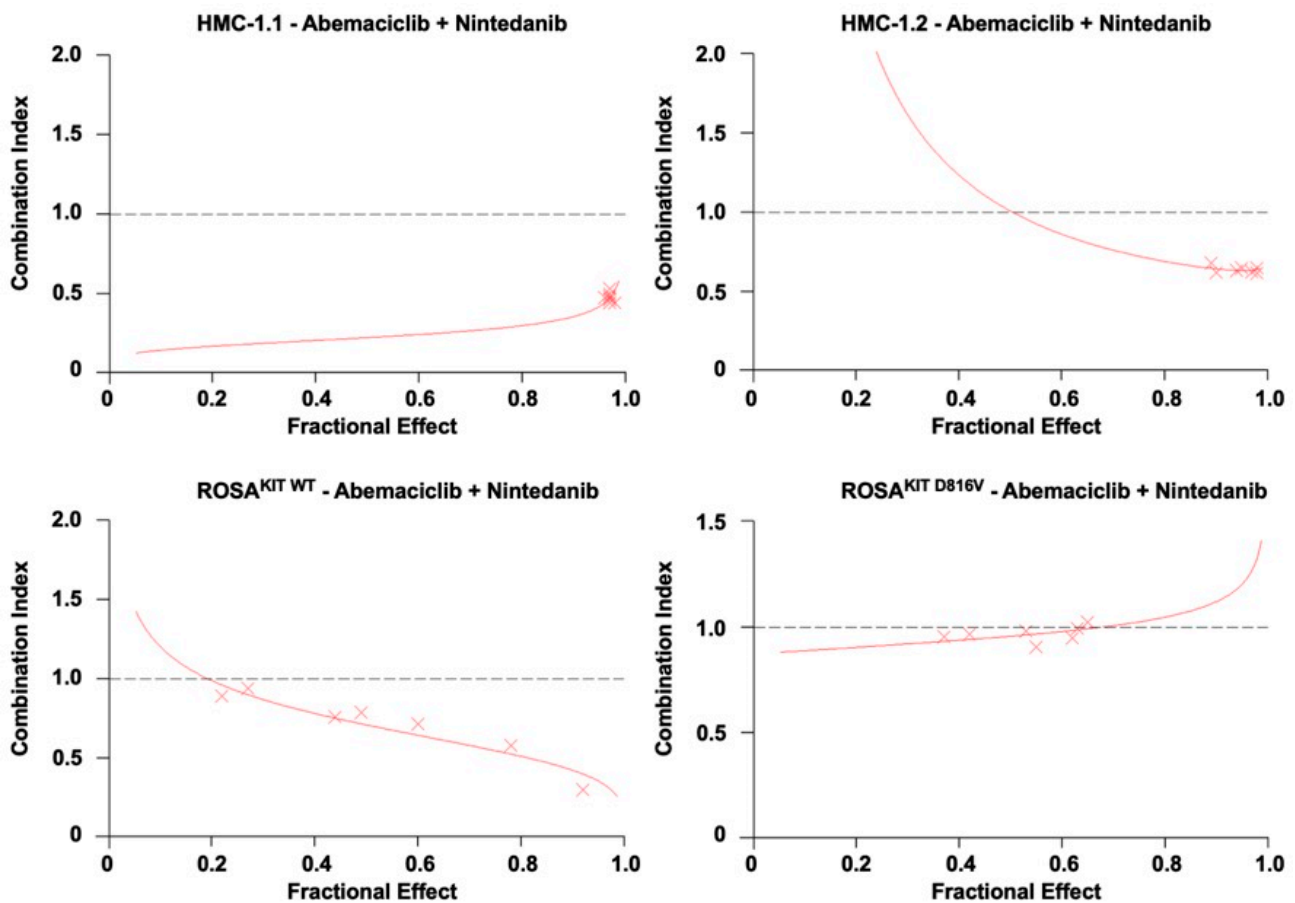

Schneeweiss-Gleixner et al., Supplemental Figure S5F

### Synergistic effects of abemaciclib and nintedanib applied in combination in MCL-like cell lines as determined by Calcsyn software

HMC-1.1, HMC-1.2, ROSA<sup>KIT</sup> WT and ROSA<sup>KIT</sup> D816V were kept in control medium or in various concentrations of abemaciclib, nintedanib or a combination of both drugs at a fixed ratio at 37°C for 48 hours. Thereafter, cell proliferation was determined by measuring <sup>3</sup>H-thymidine uptake as shown in Figure 6F in the main document. The nature of drug interaction (additive versus synergistic) was determined for each experiment by calculating combination index (CI) values using Calcsyn software. The resulting CI values are shown. A CI value of 1 indicates an additive effect, whereas CI values below 1 indicate synergistic drug effects.

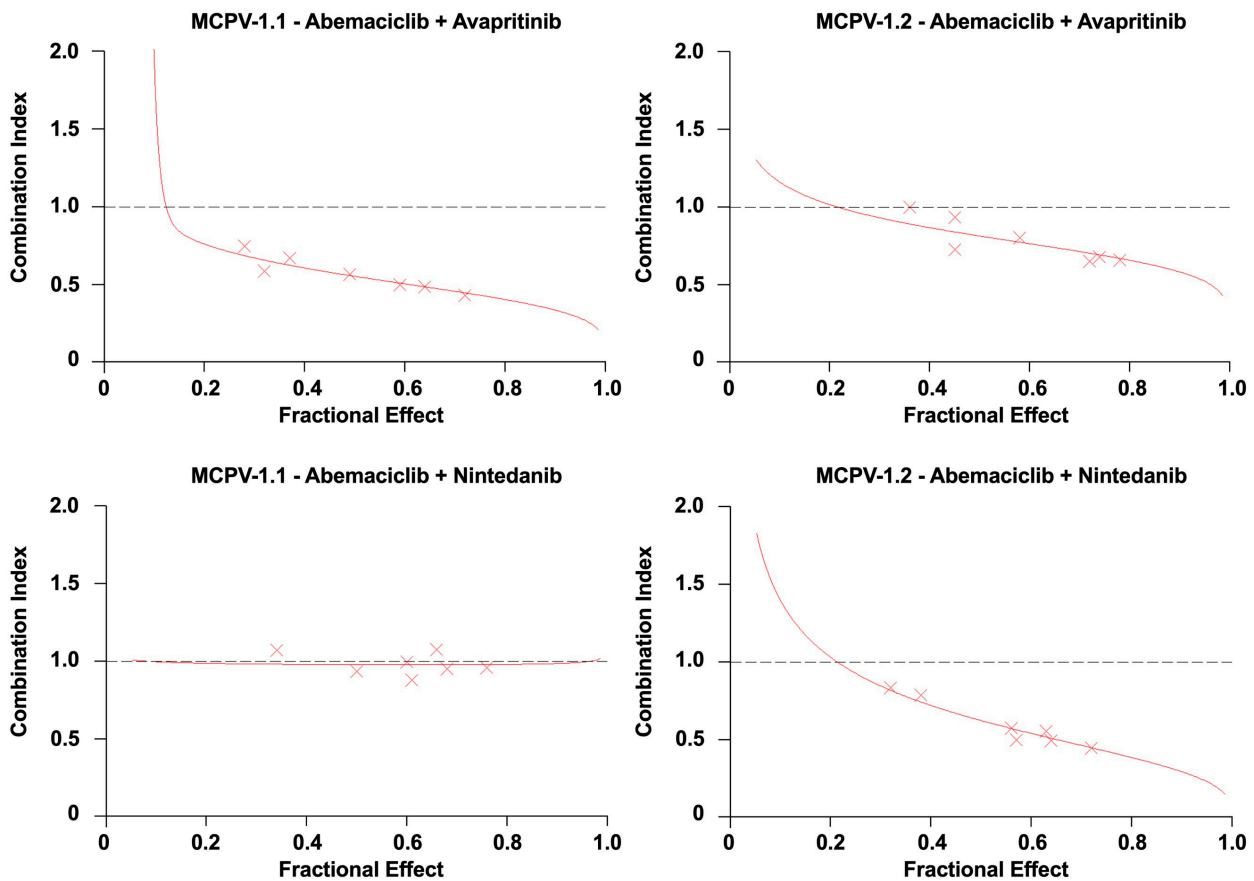

Schneeweiss-Gleixner et al., Supplemental Figure S5G

### Synergistic effects of abemaciclib and avapritinib applied in combination in highly resistant MCPV-1 cells as determined by CalcuSyn software

MCPV-1.1 and MCPV-1.2 cells were incubated with control medium (0  $\mu$ M) or medium containing various concentrations of abemaciclib alone or in combination with avapritinib (upper row) or nintedanib (lower row) at a fixed ratio at 37°C for 48 hours. Thereafter, cell proliferation was determined by measuring  $^3$ H-thymidine uptake as shown in Figure 6G in the main document. The nature of drug interaction (additive versus synergistic) was determined for each experiment by calculating combination index (CI) values using CalcuSyn software. The resulting CI values are shown. A CI value of 1 indicates an additive effect, whereas CI values below 1 indicate synergistic drug effects.

## **V. Additional Information: original western blots and densitometric analysis**

### **Original blots corresponding to Figure 1A**

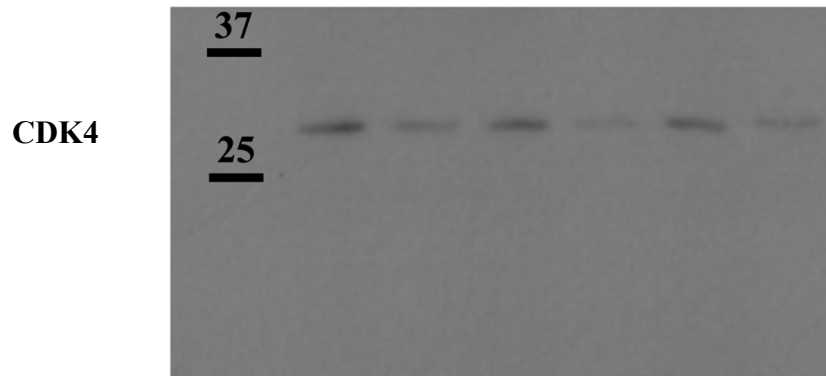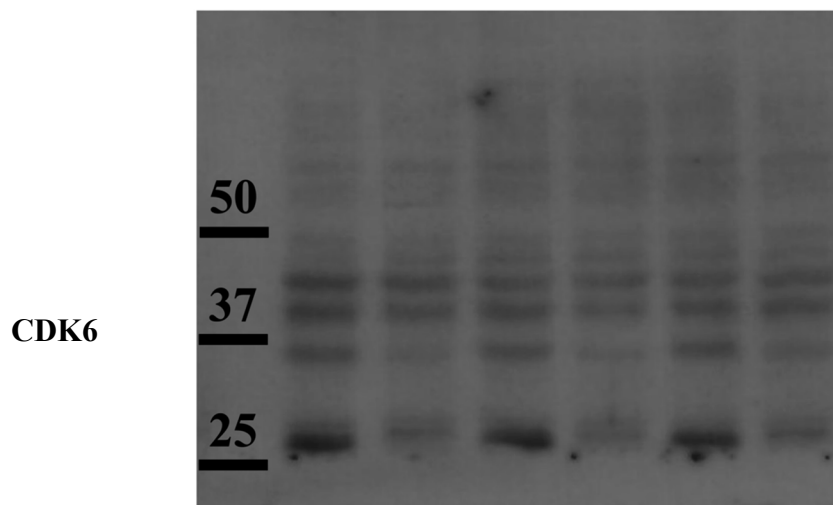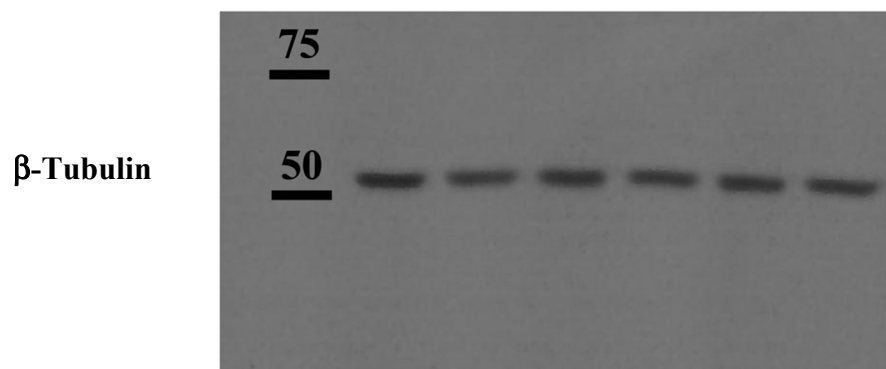

**Original blots corresponding to Figure 2A (HMC1.1)**

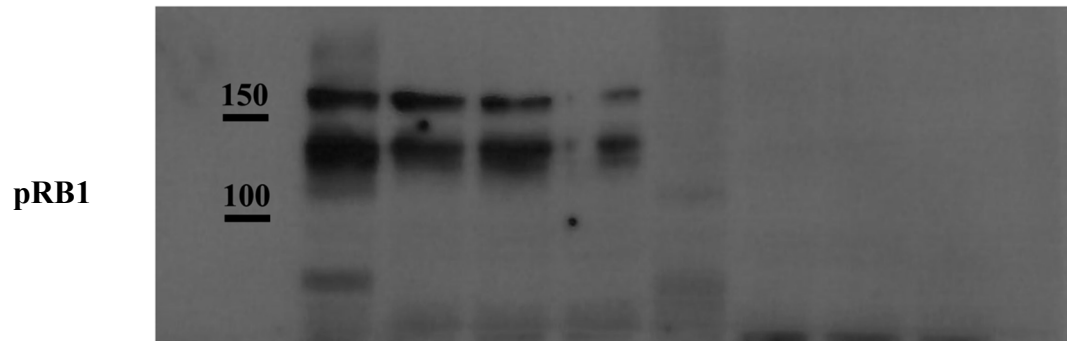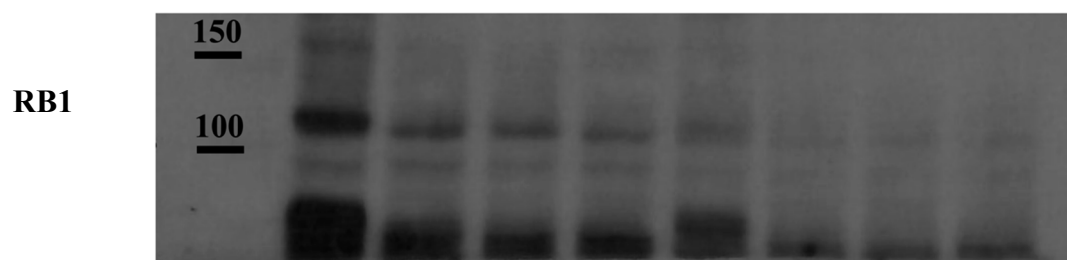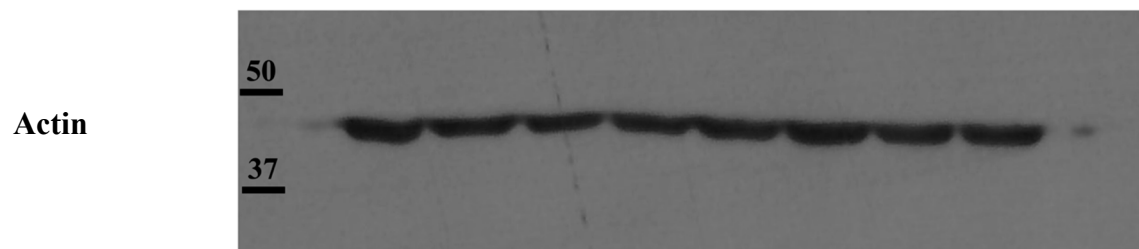

**Original blots corresponding to Figure 2A (HMC1.2)**

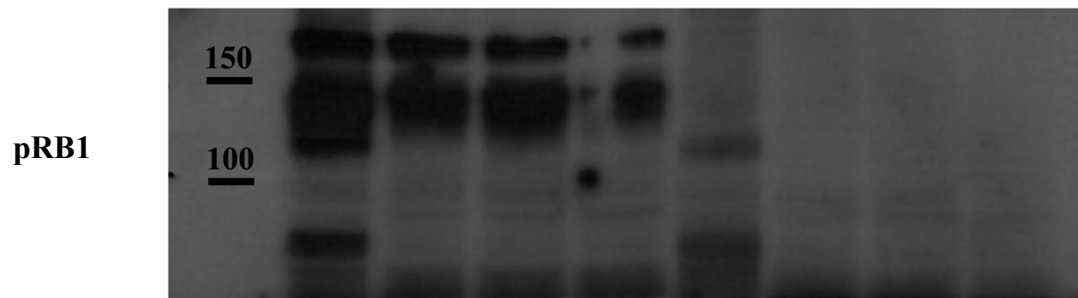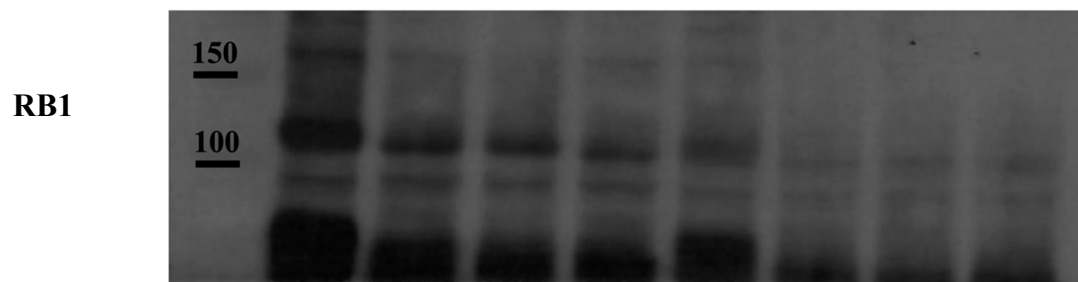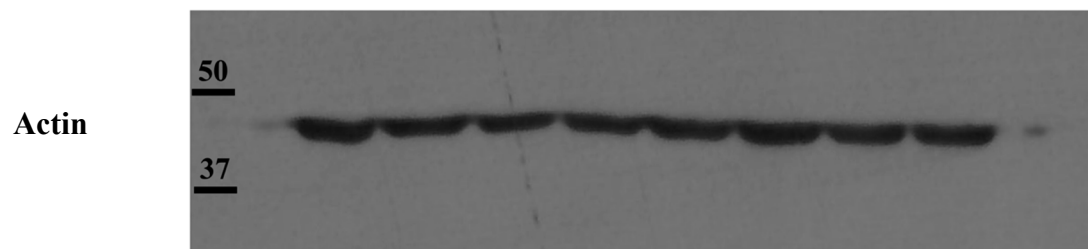

**Original blots corresponding to Figure 2B**

**pRB1**

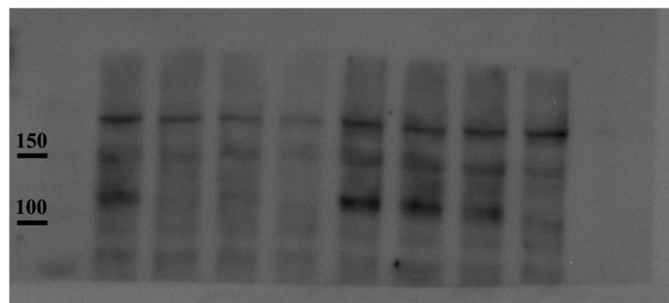

**RB1**

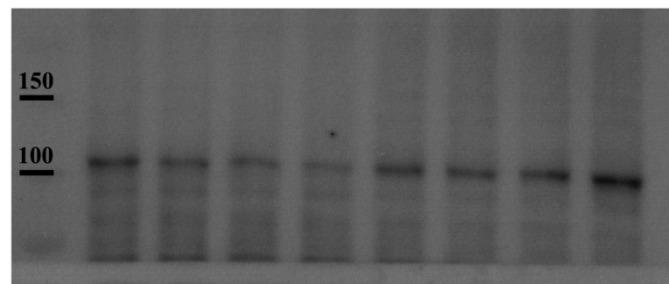

**Actin**

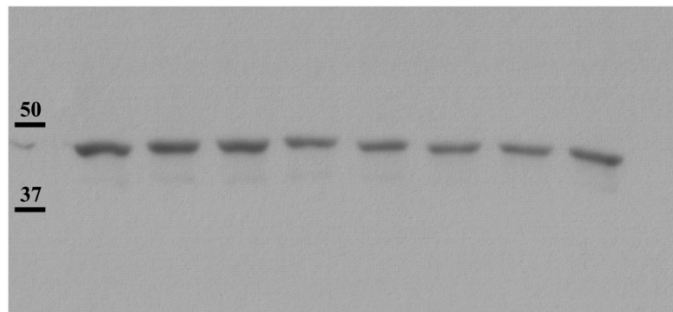

**Original blots corresponding to Figure 5E**

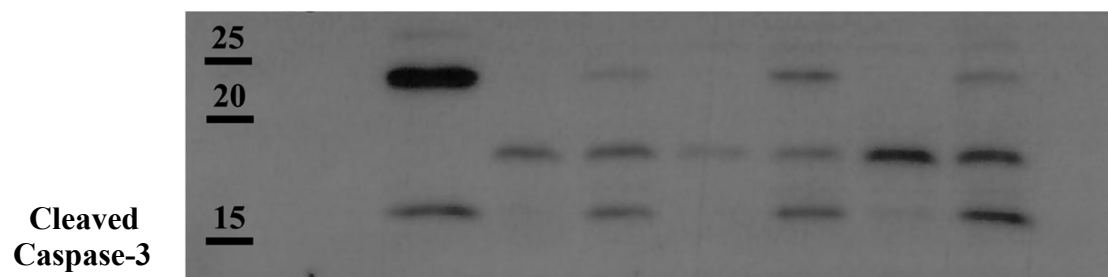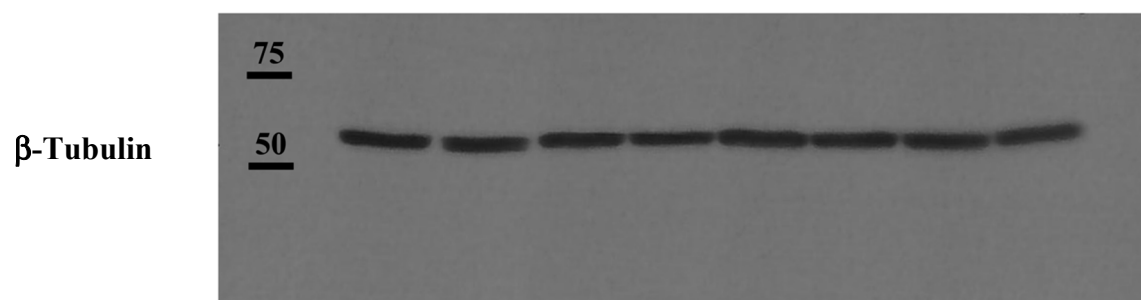

|                                       | CDK6     |       | CDK4     |       | Actin    |
|---------------------------------------|----------|-------|----------|-------|----------|
|                                       | Signal   | Ratio | Signal   | Ratio | Signal   |
| <b>HMC-1.2 NTC + Doxycycline</b>      | 24429317 | 0.99  | 19320075 | 0.79  | 24576903 |
| <b>HMC-1.2 shCDK4/6 + Doxycycline</b> | 11335468 | 0.63  | 10448125 | 0.58  | 18111832 |
| <b>HMC-1.2 NTC + Doxycycline</b>      | 18237539 | 0.75  | 17041075 | 0.70  | 24478782 |
| <b>HMC-1.2 shCDK4/6 + Doxycycline</b> | 7977246  | 0.41  | 7055953  | 0.36  | 19395711 |
| <b>HMC-1.2 NTC + Doxycycline</b>      | 18676004 | 0.79  | 15612782 | 0.66  | 23606489 |
| <b>HMC-1.2 shCDK4/6 + Doxycycline</b> | 12589418 | 0.60  | 8368882  | 0.40  | 20984125 |

**Densitometric analysis of corresponding western Blot (Figure 1A):** Ratio relative to actin for corresponding cell line. Abbreviations: CDK, cyclin-dependent kinase; RB1, retinoblastoma protein; NTC, targeting control shRNAs; shCDK4/6, shRNAs directed against CDK4 and CDK6.

| HMC-1.1                               | pRB1     |                |                        | RB1      |                |                        | Actin    |
|---------------------------------------|----------|----------------|------------------------|----------|----------------|------------------------|----------|
|                                       | Signal   | Ratio to actin | Density (% of control) | Signal   | Ratio to actin | Density (% of control) | Signal   |
| <b>Control</b>                        | 38500723 | 1.19           | 100                    | 39836530 | 1.23           | 100                    | 32302489 |
| <b>Palbociclib 1<math>\mu</math>M</b> | 9690045  | 0.35           | 29                     | 21274530 | 0.76           | 62                     | 28075782 |
| <b>Ribociclib 1<math>\mu</math>M</b>  | 18817602 | 0.81           | 68                     | 16316075 | 0.70           | 57                     | 23353004 |
| <b>Abemaciclib 1<math>\mu</math>M</b> | 4003175  | 0.16           | 13                     | 13901903 | 0.57           | 46                     | 24478004 |

| HMC-1.2                               | pRB1     |                |                        | RB1      |                |                        | Actin    |
|---------------------------------------|----------|----------------|------------------------|----------|----------------|------------------------|----------|
|                                       | Signal   | Ratio to actin | Density (% of control) | Signal   | Ratio to actin | Density (% of control) | Signal   |
| <b>Control</b>                        | 40918602 | 1.40           | 100                    | 38853530 | 1.33           | 100                    | 29290418 |
| <b>Palbociclib 1<math>\mu</math>M</b> | 13599217 | 0.39           | 28                     | 17925874 | 0.52           | 39                     | 34432539 |
| <b>Ribociclib 1<math>\mu</math>M</b>  | 18239024 | 0.69           | 49                     | 14636903 | 0.56           | 42                     | 26319296 |
| <b>Abemaciclib 1<math>\mu</math>M</b> | 14181711 | 0.51           | 36                     | 16420066 | 0.59           | 44                     | 27977246 |

**Densitometric analysis of corresponding western Blot (Figure 2A):** Ratio relative to actin for corresponding condition; density was calculated as percent (%) of control (the ratio pRB1/actin and RB1/actin respectively for cells kept under control conditions represent 100%). Abbreviations: CDK, cyclin-dependent kinase; RB1, retinoblastoma protein; pRB1, phosphorylated RB1.

| ROSA <sup>KIT WT</sup> | pRB1     |                |                        | RB1      |                |                        | Actin    |
|------------------------|----------|----------------|------------------------|----------|----------------|------------------------|----------|
|                        | Signal   | Ratio to actin | Density (% of control) | Signal   | Ratio to actin | Density (% of control) | Signal   |
| Control                | 57060116 | 0.97           | 100                    | 50873359 | 0.86           | 100                    | 59075238 |
| Palbociclib 1 $\mu$ M  | 31284480 | 0.61           | 63                     | 38501945 | 0.75           | 87                     | 51255681 |
| Ribociclib 1 $\mu$ M   | 30702602 | 0.62           | 64                     | 32441016 | 0.66           | 77                     | 49256681 |
| Abemaciclib 1 $\mu$ M  | 18604480 | 0.52           | 54                     | 26343066 | 0.74           | 86                     | 35531388 |

| ROSA <sup>KIT D816V</sup> | pRB1     |                |                        | RB1      |                |                        | Actin    |
|---------------------------|----------|----------------|------------------------|----------|----------------|------------------------|----------|
|                           | Signal   | Ratio to actin | Density (% of control) | Signal   | Ratio to actin | Density (% of control) | Signal   |
| Control                   | 58398016 | 1.65           | 100                    | 38669309 | 1.09           | 100                    | 35435267 |
| Palbociclib 1 $\mu$ M     | 61268551 | 1.82           | 110                    | 36104430 | 1.07           | 98                     | 33730631 |
| Ribociclib 1 $\mu$ M      | 52477309 | 1.64           | 99                     | 42870894 | 1.34           | 123                    | 32044702 |
| Abemaciclib 1 $\mu$ M     | 31412752 | 0.70           | 42                     | 62259238 | 1.39           | 128                    | 44931794 |

**Densitometric analysis of corresponding western Blot (Figure 2B):** Ratio relative to actin for corresponding condition; density was calculated as percent (%) of control (the ratio pRB1/actin and RB1/actin respectively for cells kept under control conditions represent 100%). Abbreviations: CDK, cyclin-dependent kinase; RB1, retinoblastoma protein; pRB1, phosphorylated RB1.

|                                                           | Cleaved Caspase-3 |       | Actin    |
|-----------------------------------------------------------|-------------------|-------|----------|
|                                                           | Signal            | Ratio | Signal   |
| <b>Control HMC-1.1</b>                                    | 122314            | 0.00  | 33705368 |
| <b>Palbociclib + Midostaurin HMC-1.1</b>                  | 18895974          | 0.64  | 29546832 |
| <b>Control HMC-1.2</b>                                    | 1138205           | 0.04  | 30866418 |
| <b>Palbociclib + Midostaurin HMC-1.2</b>                  | 8911761           | 0.33  | 26867296 |
| <b>Control ROSA<sup>KIT WT</sup></b>                      | 275728            | 0.01  | 34735246 |
| <b>Palbociclib + Midostaurin ROSA<sup>KIT WT</sup></b>    | 15579660          | 0.51  | 30577711 |
| <b>Control ROSA<sup>KIT D816V</sup></b>                   | 4588397           | 0.13  | 34187368 |
| <b>Palbociclib + Midostaurin ROSA<sup>KIT D816V</sup></b> | 26267660          | 0.92  | 28655368 |

**Densitometric analysis of corresponding western Blot (Figure 5E):** Ratio relative to  $\beta$ -tubulin for corresponding condition.
